# Supplementary material for: Cooperation of MLL1 and Jun in controlling H3K4me3 on enhancers in colorectal cancer
Source: PubMed Central journal article supplement (PMC10680327; doi:10.1186/s13059-023-03108-3), 2023-11-27

# Uncropped western blotting analysis

## Uncropped western blotting and gel for Fig. 5

Fig. 5D

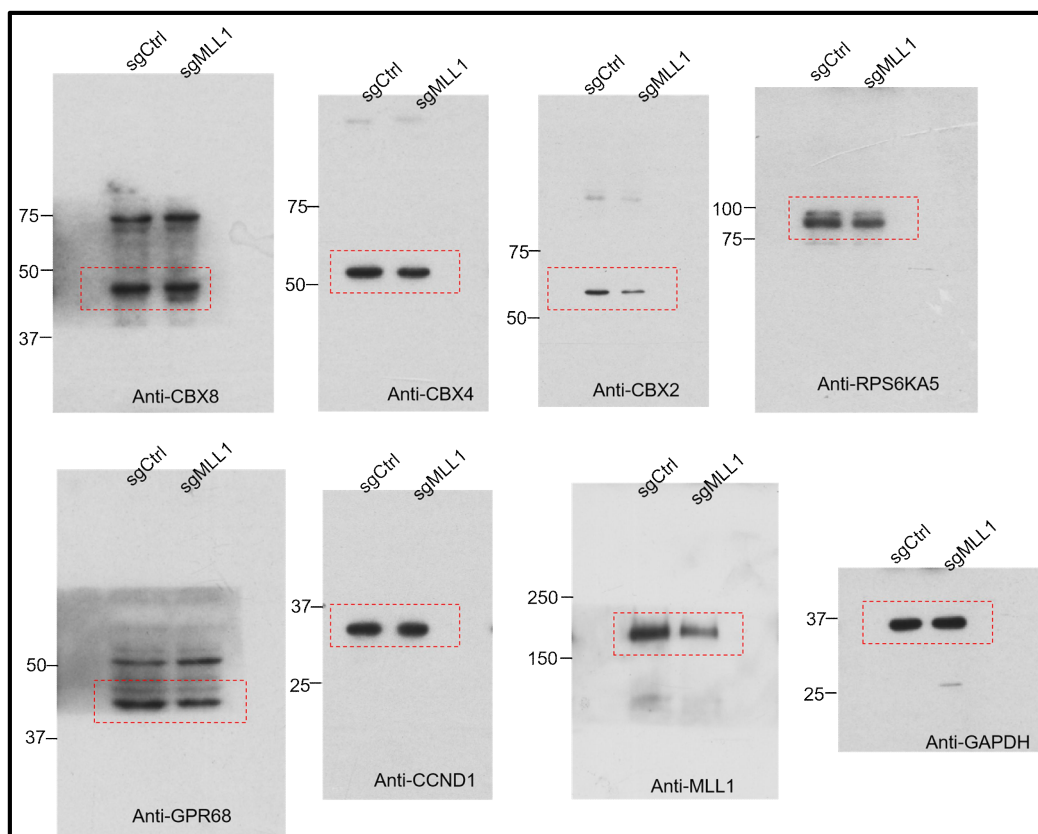

Fig. 5J

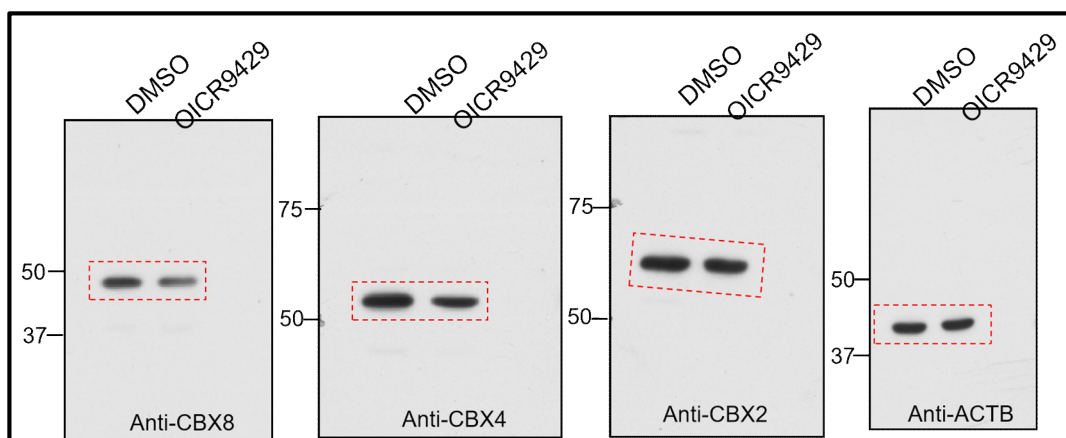

Fig. 5M

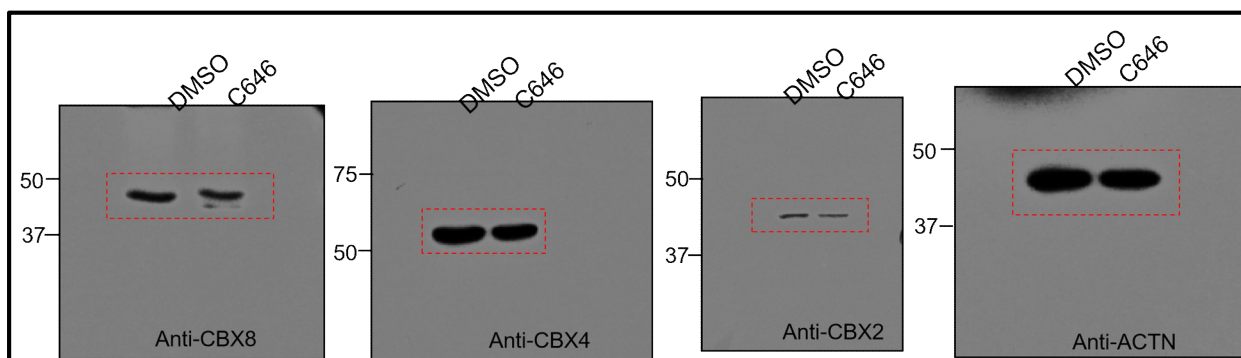

# Uncropped western blotting and gel for Fig. 6

## Fig. 6D

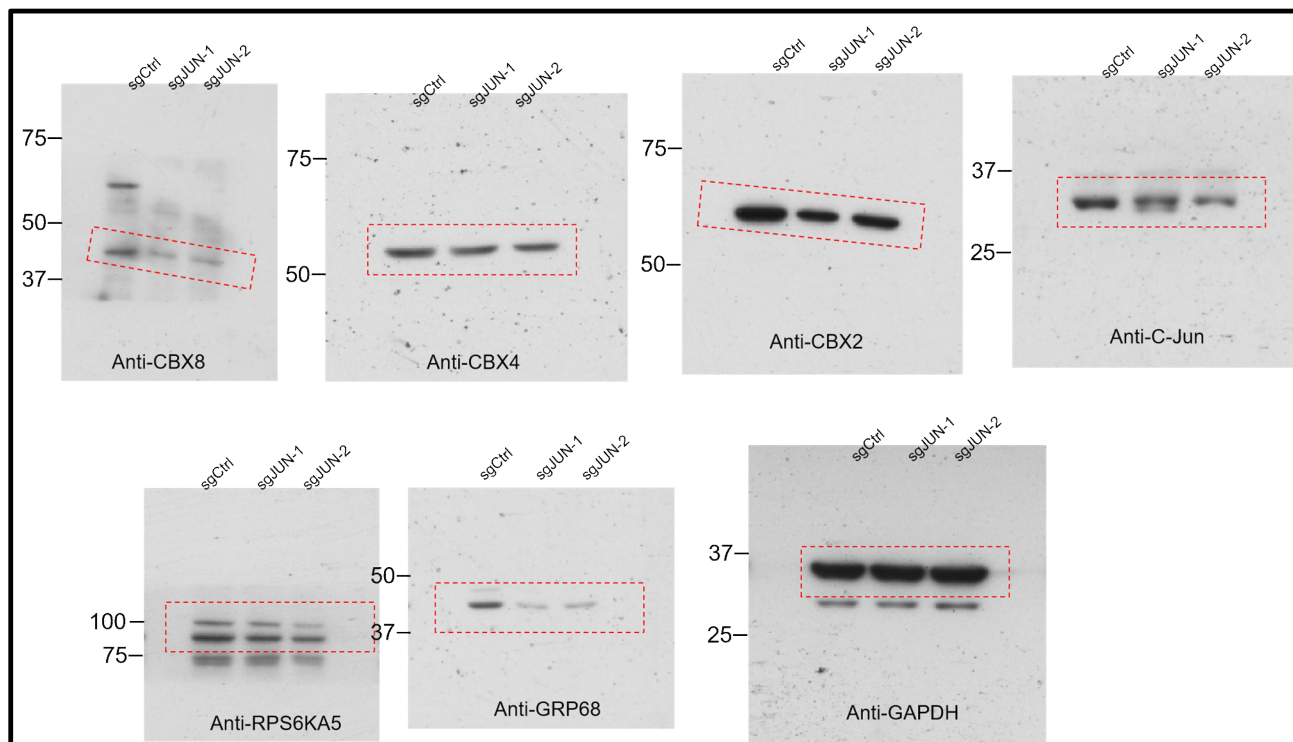

## Fig. 6G

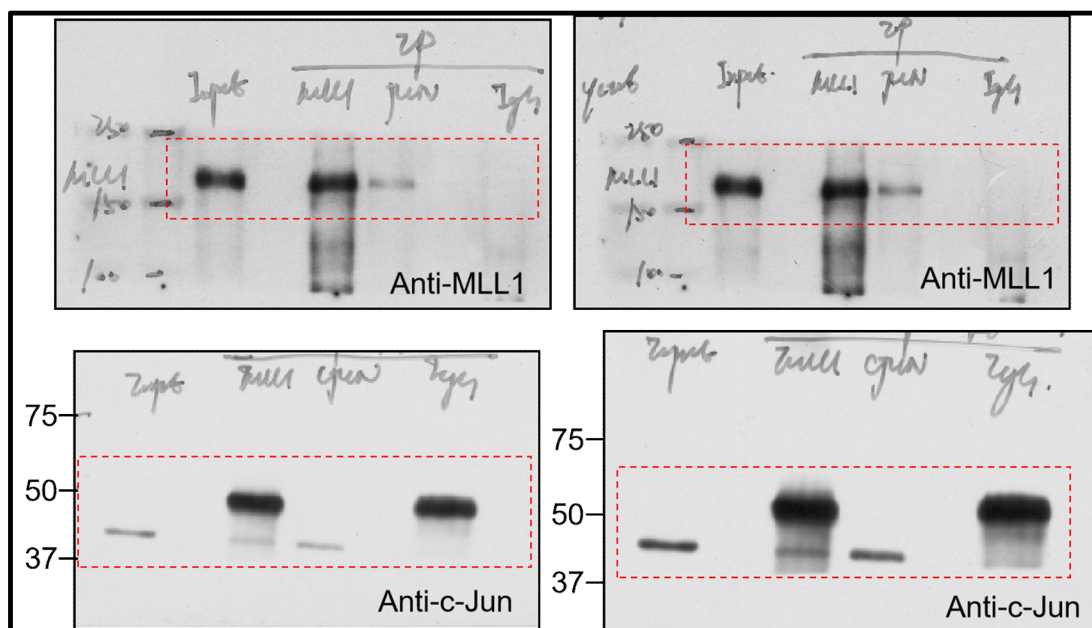

Uncropped western blotting and gel for Fig. S5

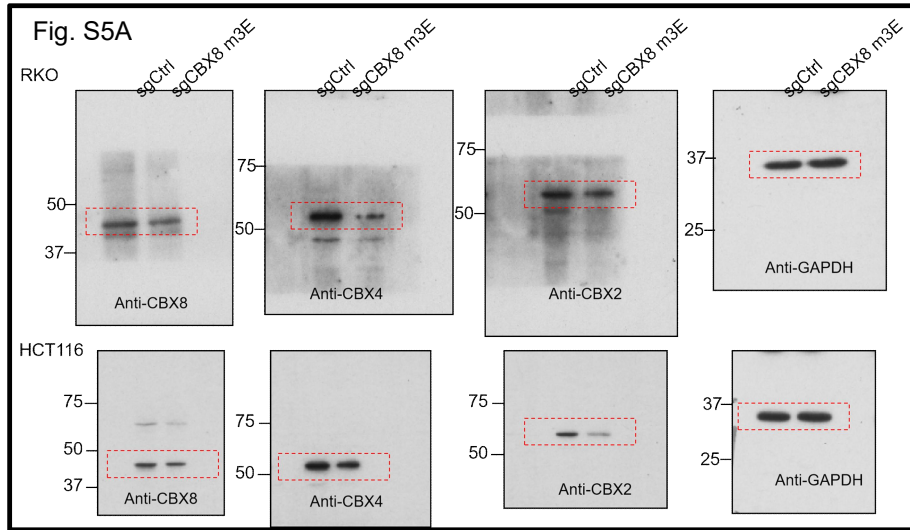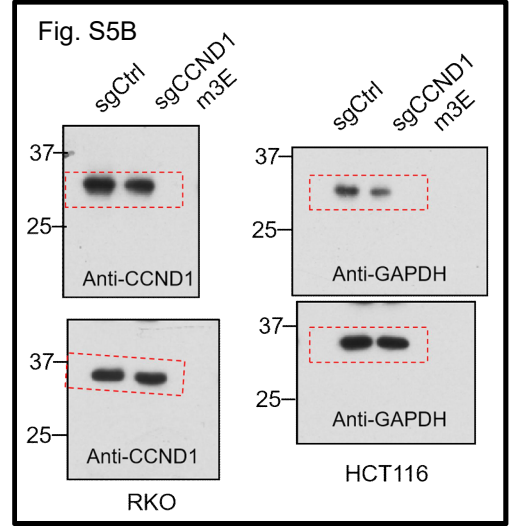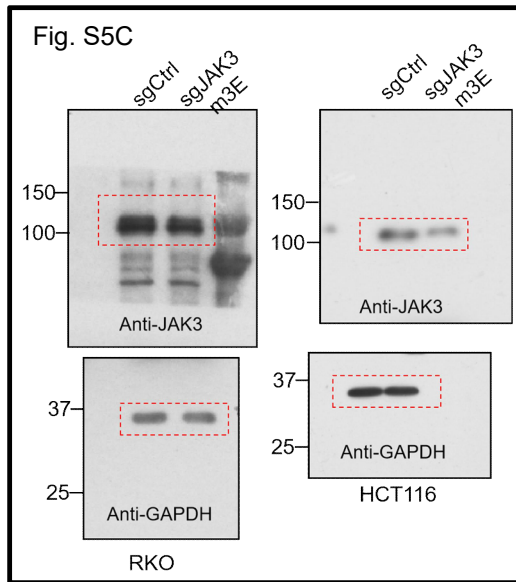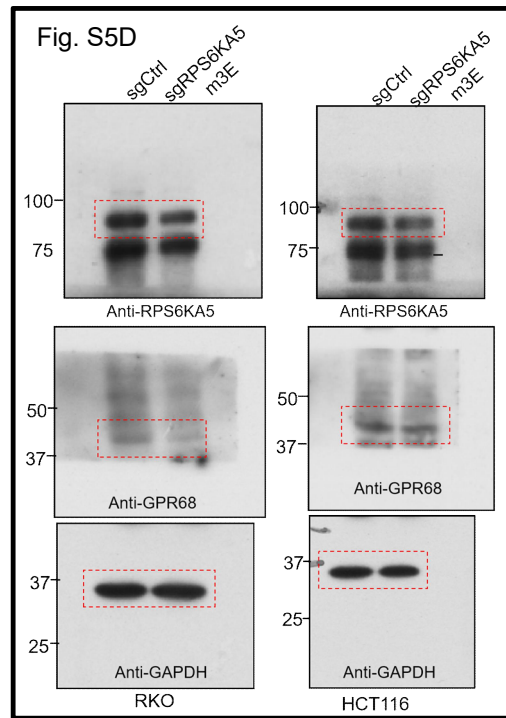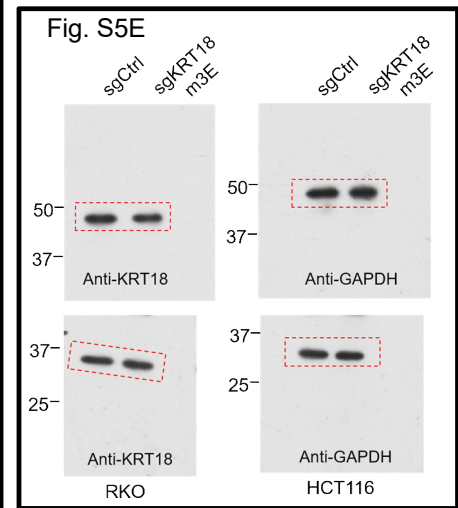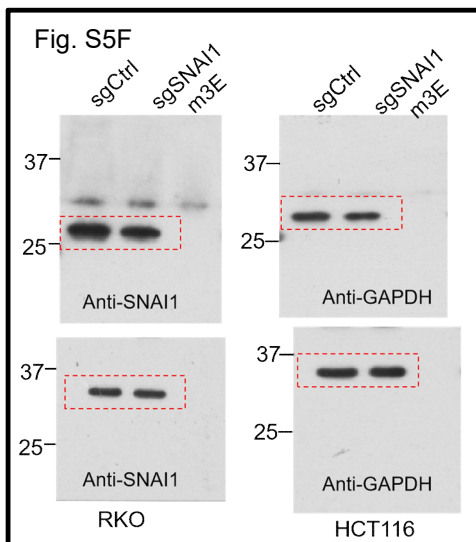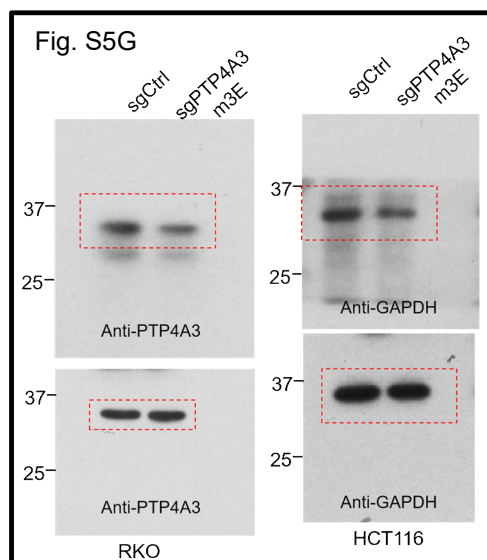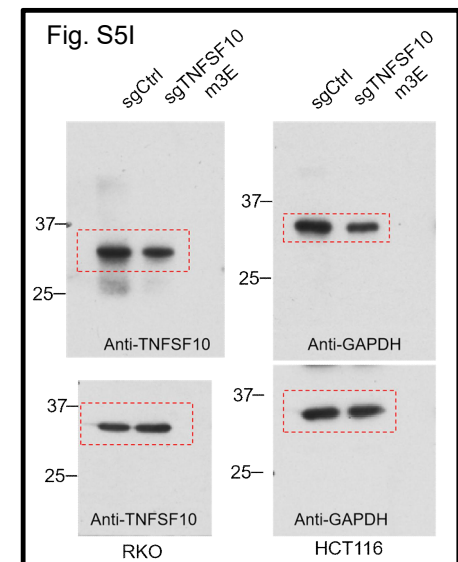

Fig. S7H

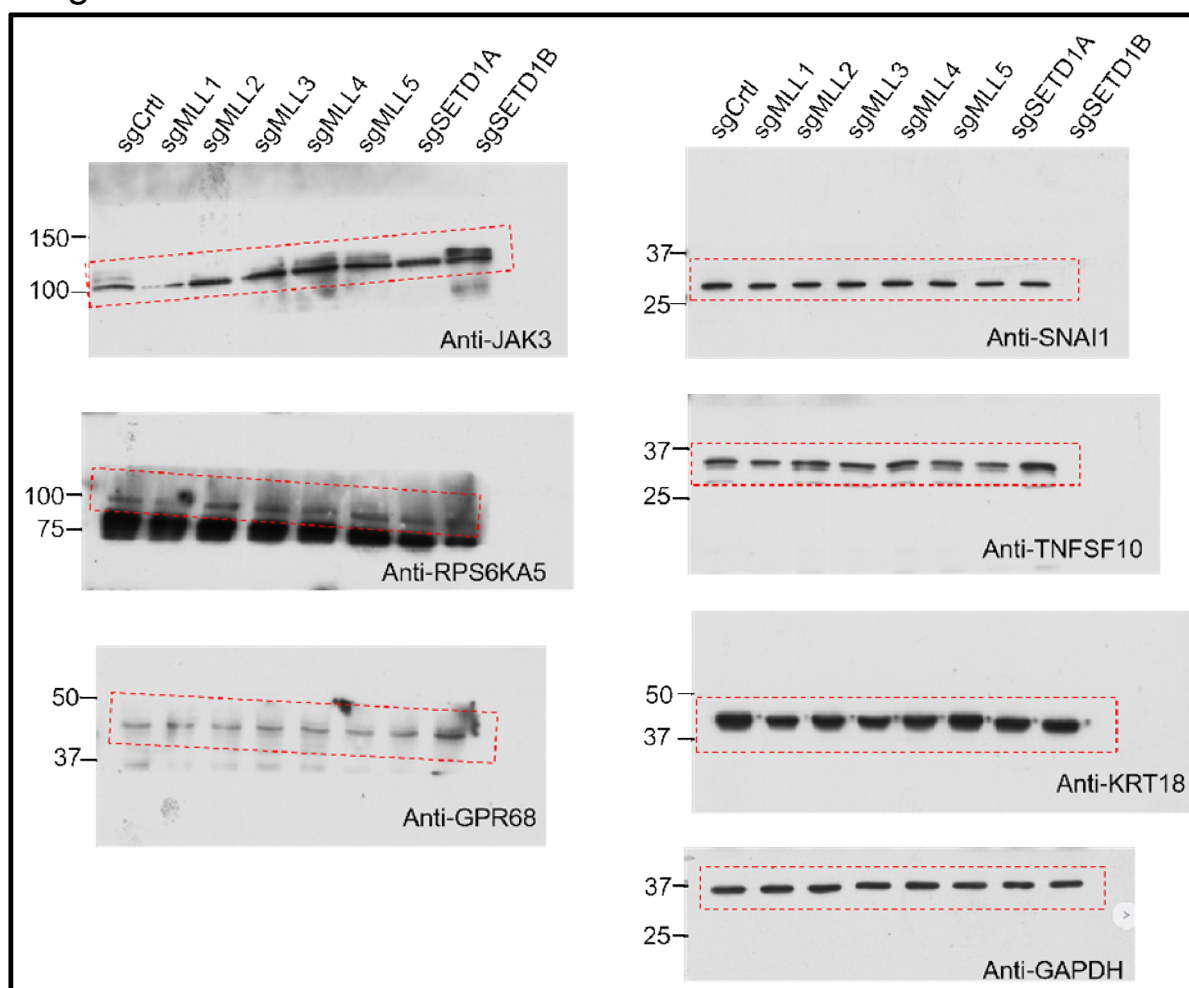

Fig. S8D

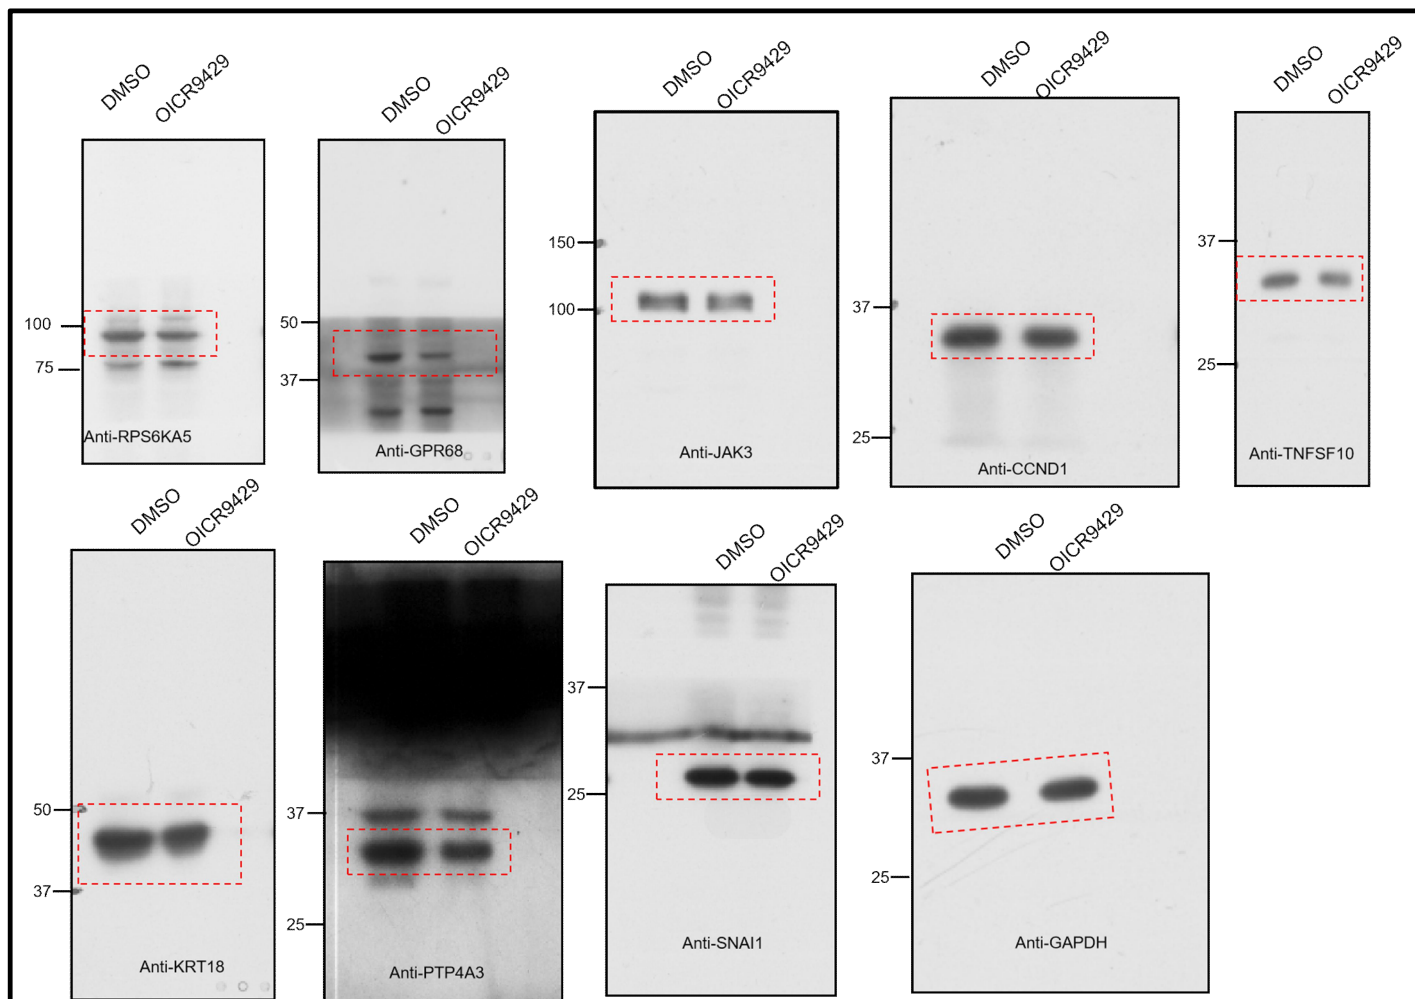

Fig. S9B

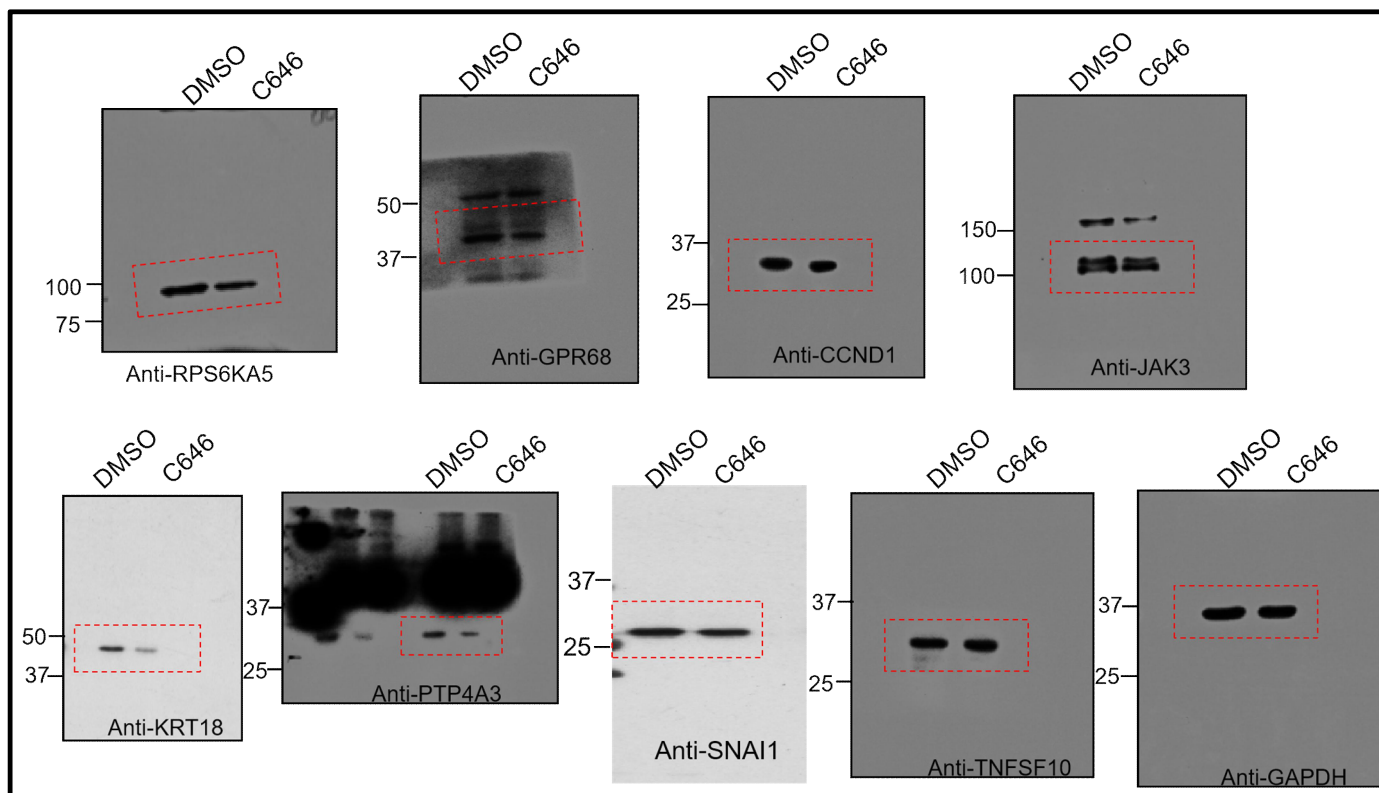

Fig. S10D

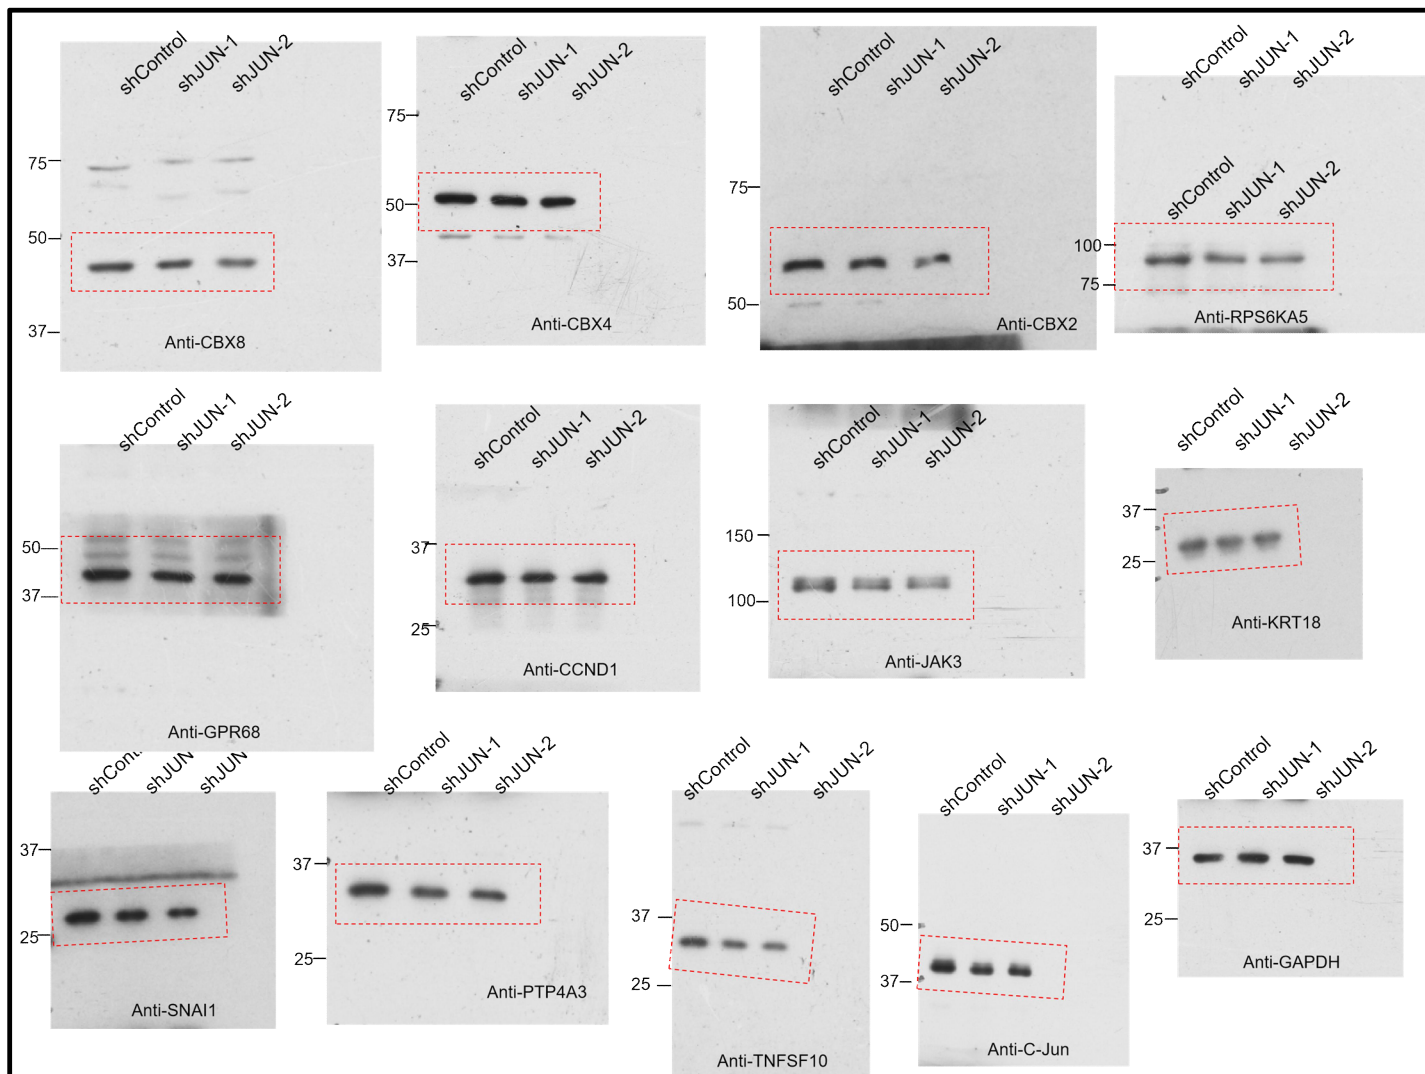

Supplement: 13059_2023_3108_MOESM4_ESM.pdf [file 13059_2023_3108_MOESM4_ESM.pdf]
