# Supplementary material for: Cooperation of MLL1 and Jun in controlling H3K4me3 on enhancers in colorectal cancer
Source: PubMed Central journal article supplement (PMC10680327; doi:10.1186/s13059-023-03108-3), 2023-11-27
Supplement: 13059_2023_3108_MOESM1_ESM.pdf [file 13059_2023_3108_MOESM1_ESM.pdf]

Fig. S1

A

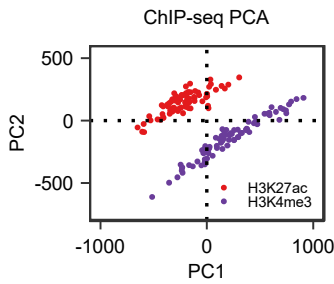

B

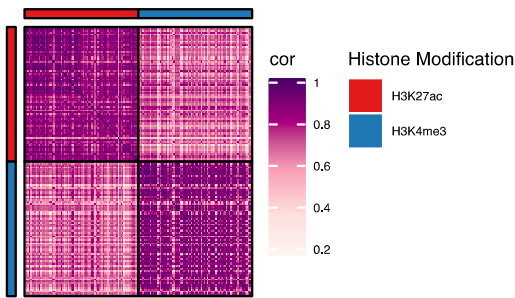

C

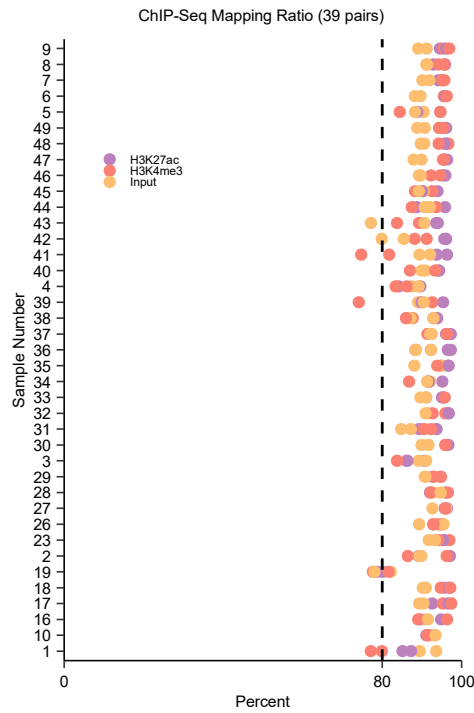

D

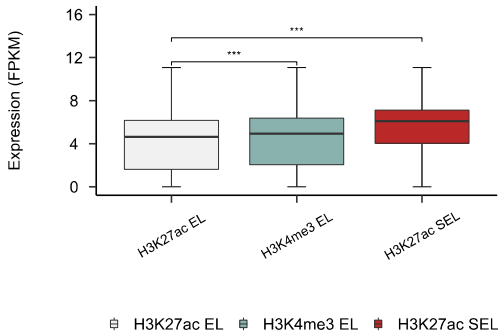

E

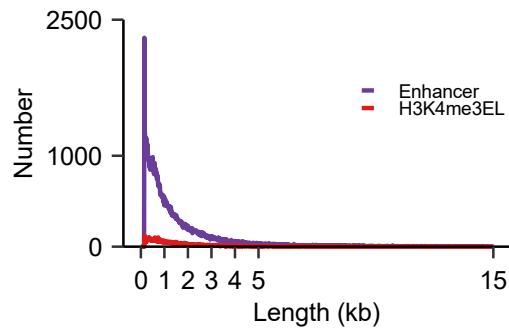

**Fig. S1 Quality control of sequencing data. (A)** PCA using H3K27ac and H3K4me3 on whole genome. **(B)** Heatmap shows the correlation between samples with different modifications. **(C)** Mapping ratio of ChIP-Seq 39 pairs. H3K27ac: purple, H3K4me3: orange, Input: yellow. **(D)** Gene expression associated with typical enhancers (white), m3Es (green) and super enhancers (red). Statistical analysis was performed using a two-sided Student t test. p value was labelled on the corresponding items. \*\*\*p < 0.001. **(E)** The length distribution of typical enhancer (purple) and m3Es (red).

Fig. S2

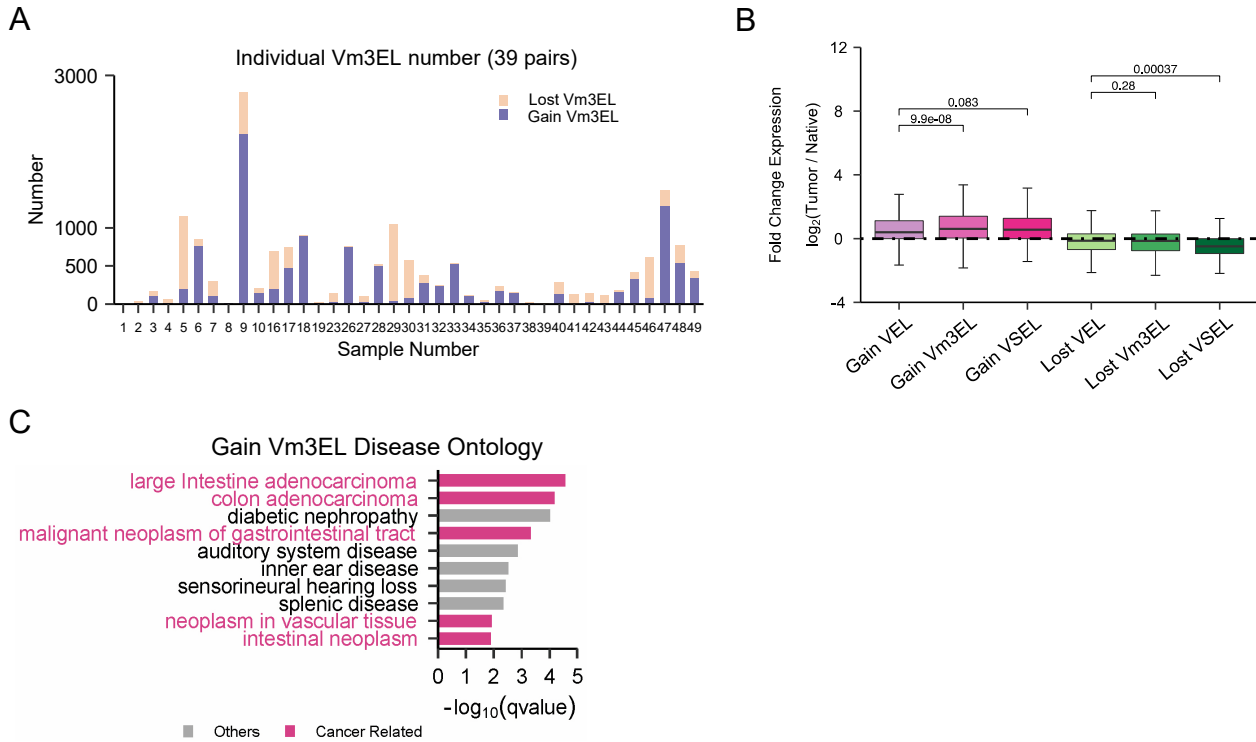

**Fig. S2 Functional analysis of gain and lost Vm3Es in CRC. (A)** Vm3Es (including gain and lost Vm3Es) number of each pair of samples. **(B)** Fold change of gene expression associated with gained (red) VELs, VSELs and Vm3Es (red), and lost (green) VELs, VSELs and Vm3Es. Statistical analysis was performed using a two-sided Student t test. p value was labelled on the corresponding items. **(C)** The human disease ontology which gained Vm3Es participated in enriched by GREAT (version 3.0.0). The red bar represents cancer related terms and the grey bar represents other terms.

Fig. S3

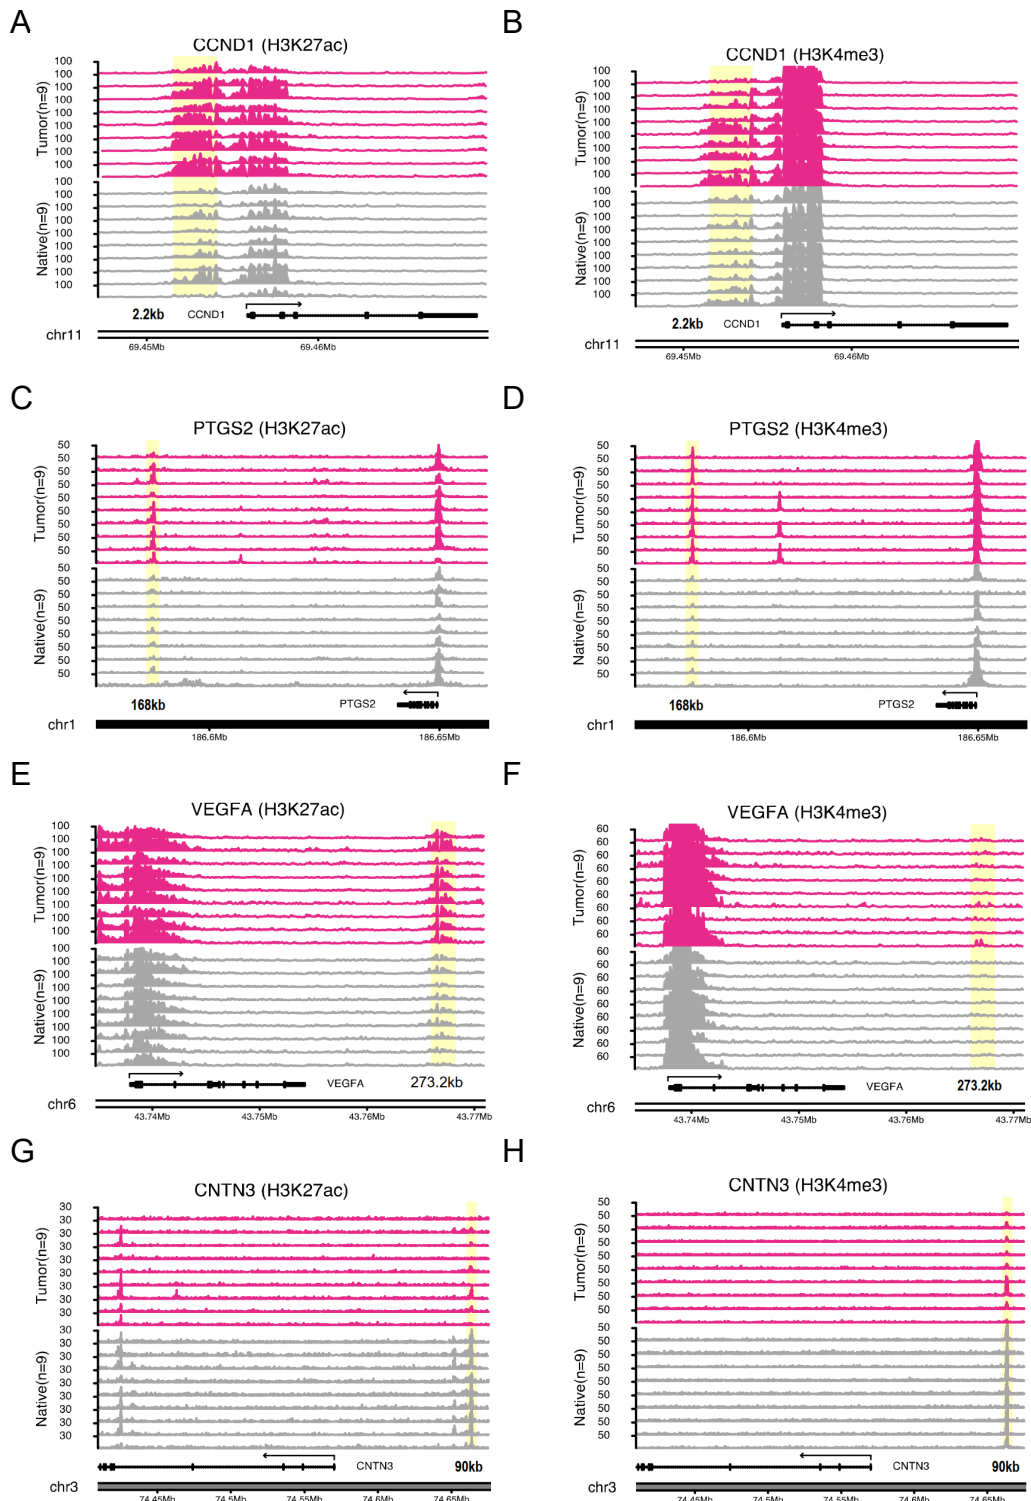

**Fig. S3 Gene browser view of representative gain Vm3Es in CRC. (A&B)** Representative H3K27ac (A) and H3K4me3 (B) tracks of gain Vm3E at *CCND1* gene loci. **(C&D)** Representative H3K27ac (C) and H3K4me3 (D) tracks of gain Vm3E at *PTGS2* gene loci. **(E&F)** Representative H3K27ac (E) and H3K4me3 (F) tracks of gain Vm3E at *VEGFA* gene loci. **(G&H)** Representative H3K27ac (E) and H3K4me3 (F) tracks of lost Vm3E at *CNTN3* gene loci. Vm3Es was highlighted in a yellow shade.

Fig. S4  
A

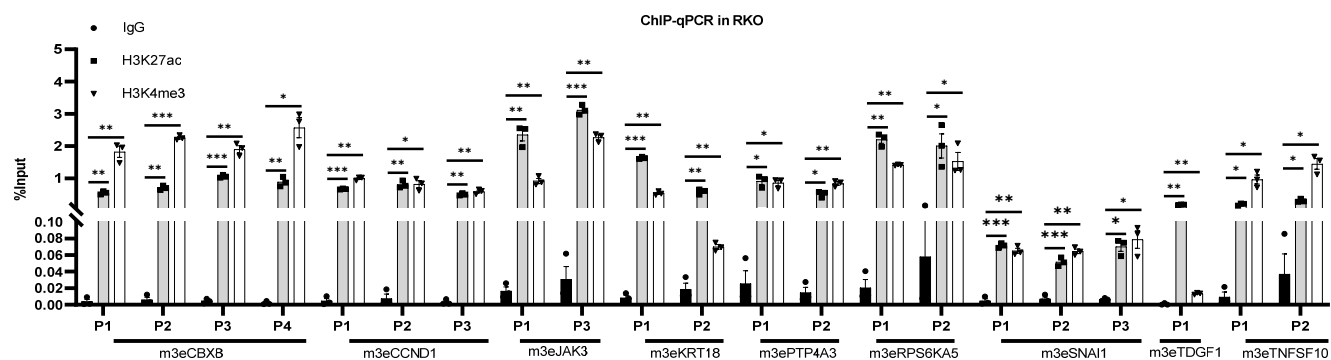

B

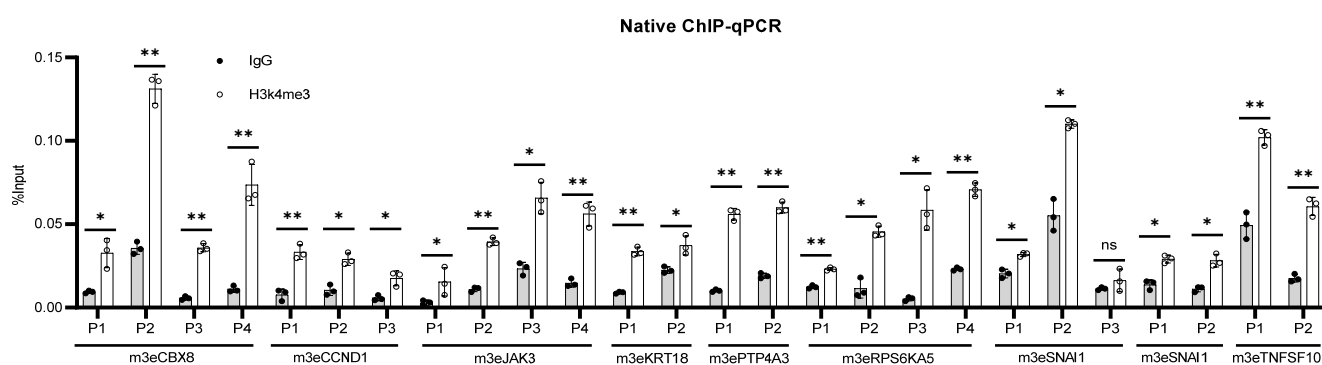

**Fig. S4 Validation of identified Vm3Es. (A)** ChIP-qPCR showing the H3K27ac and H3K4me3 level at m3Es in HCT116. **(B)** Native ChIP-qPCR showing the H3K4me3 level at m3Es in RKO.

Fig. S5

A

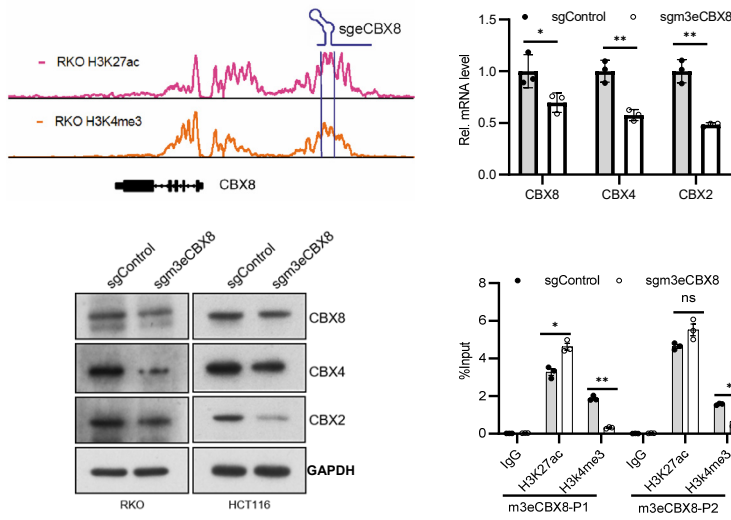

B

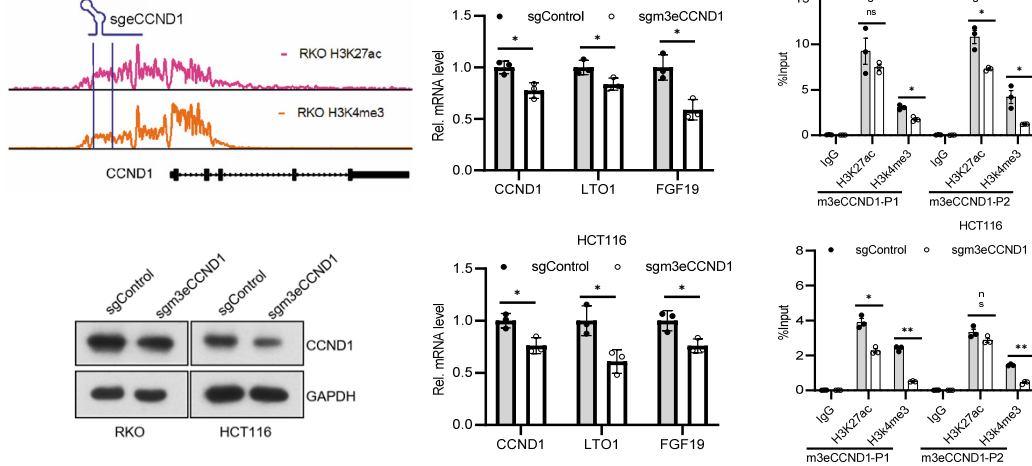

C

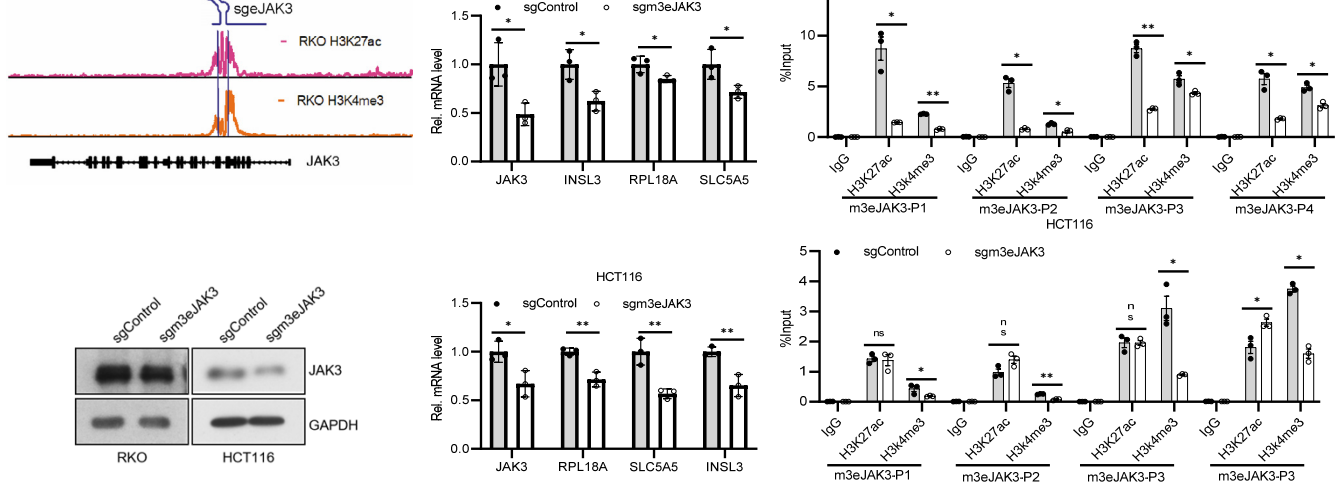

Fig. S5 (Continued)

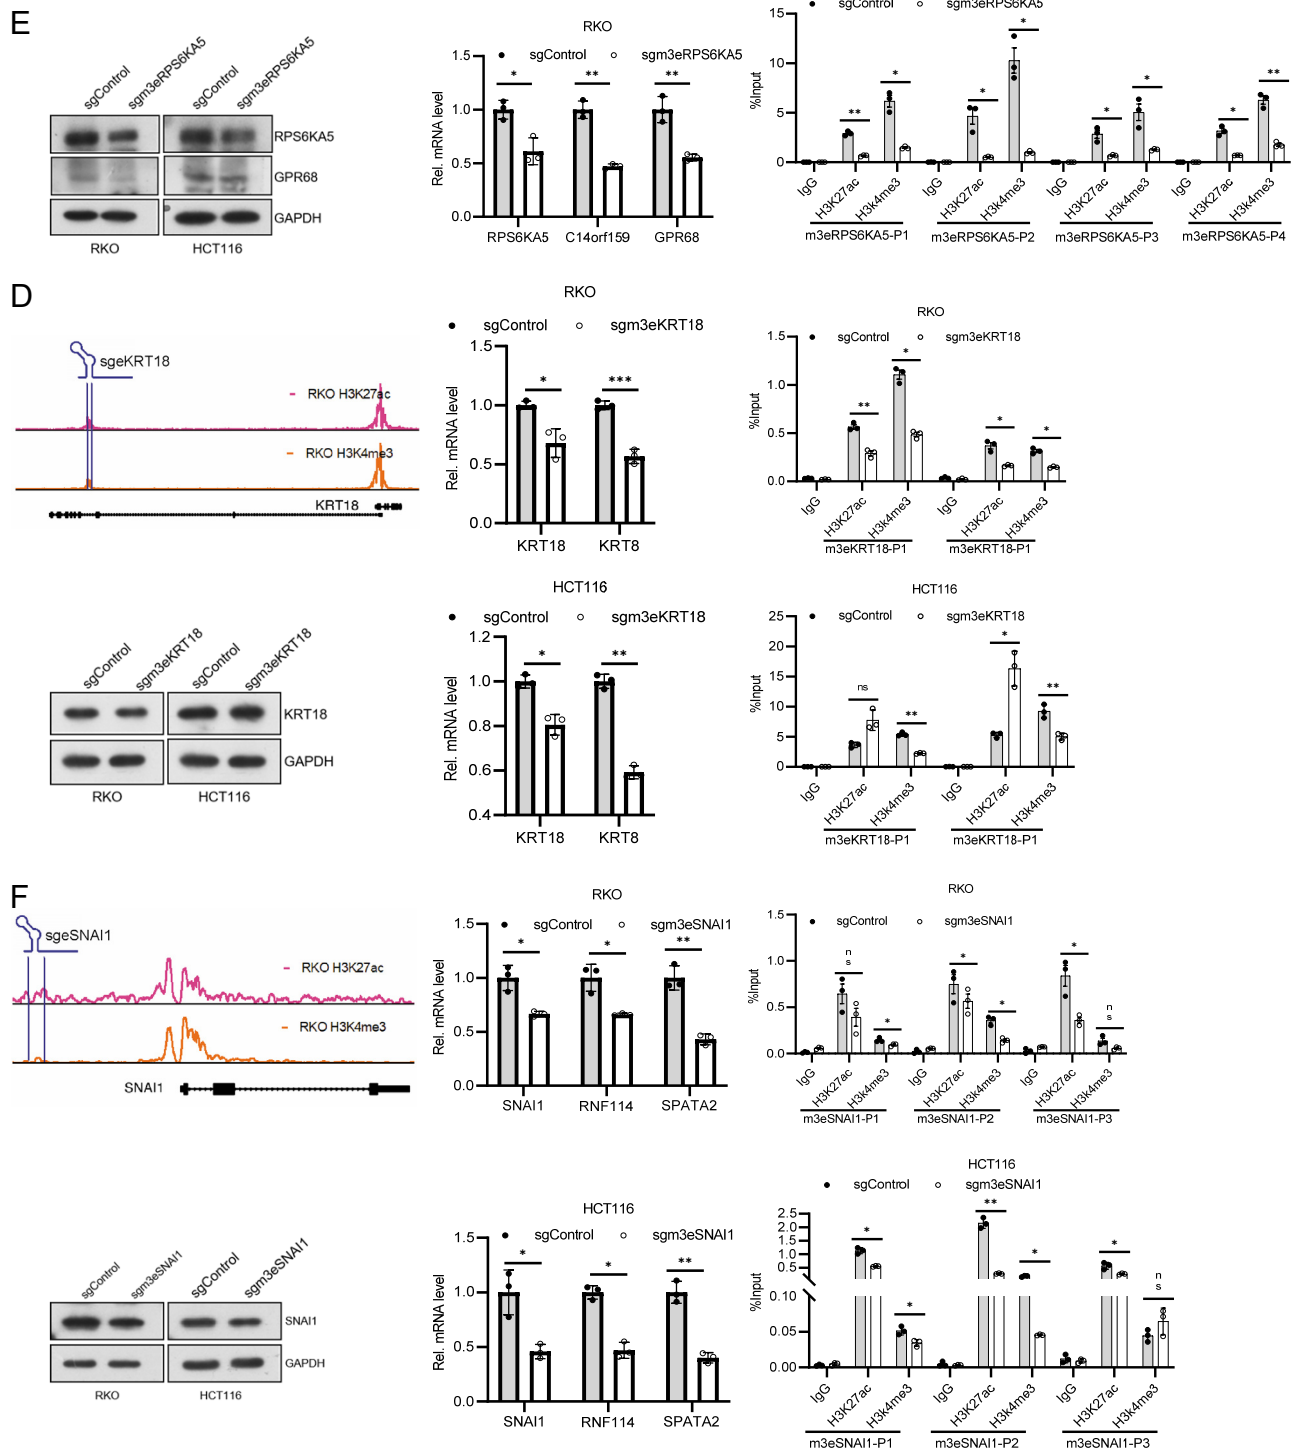

Fig. S5 (Continued)

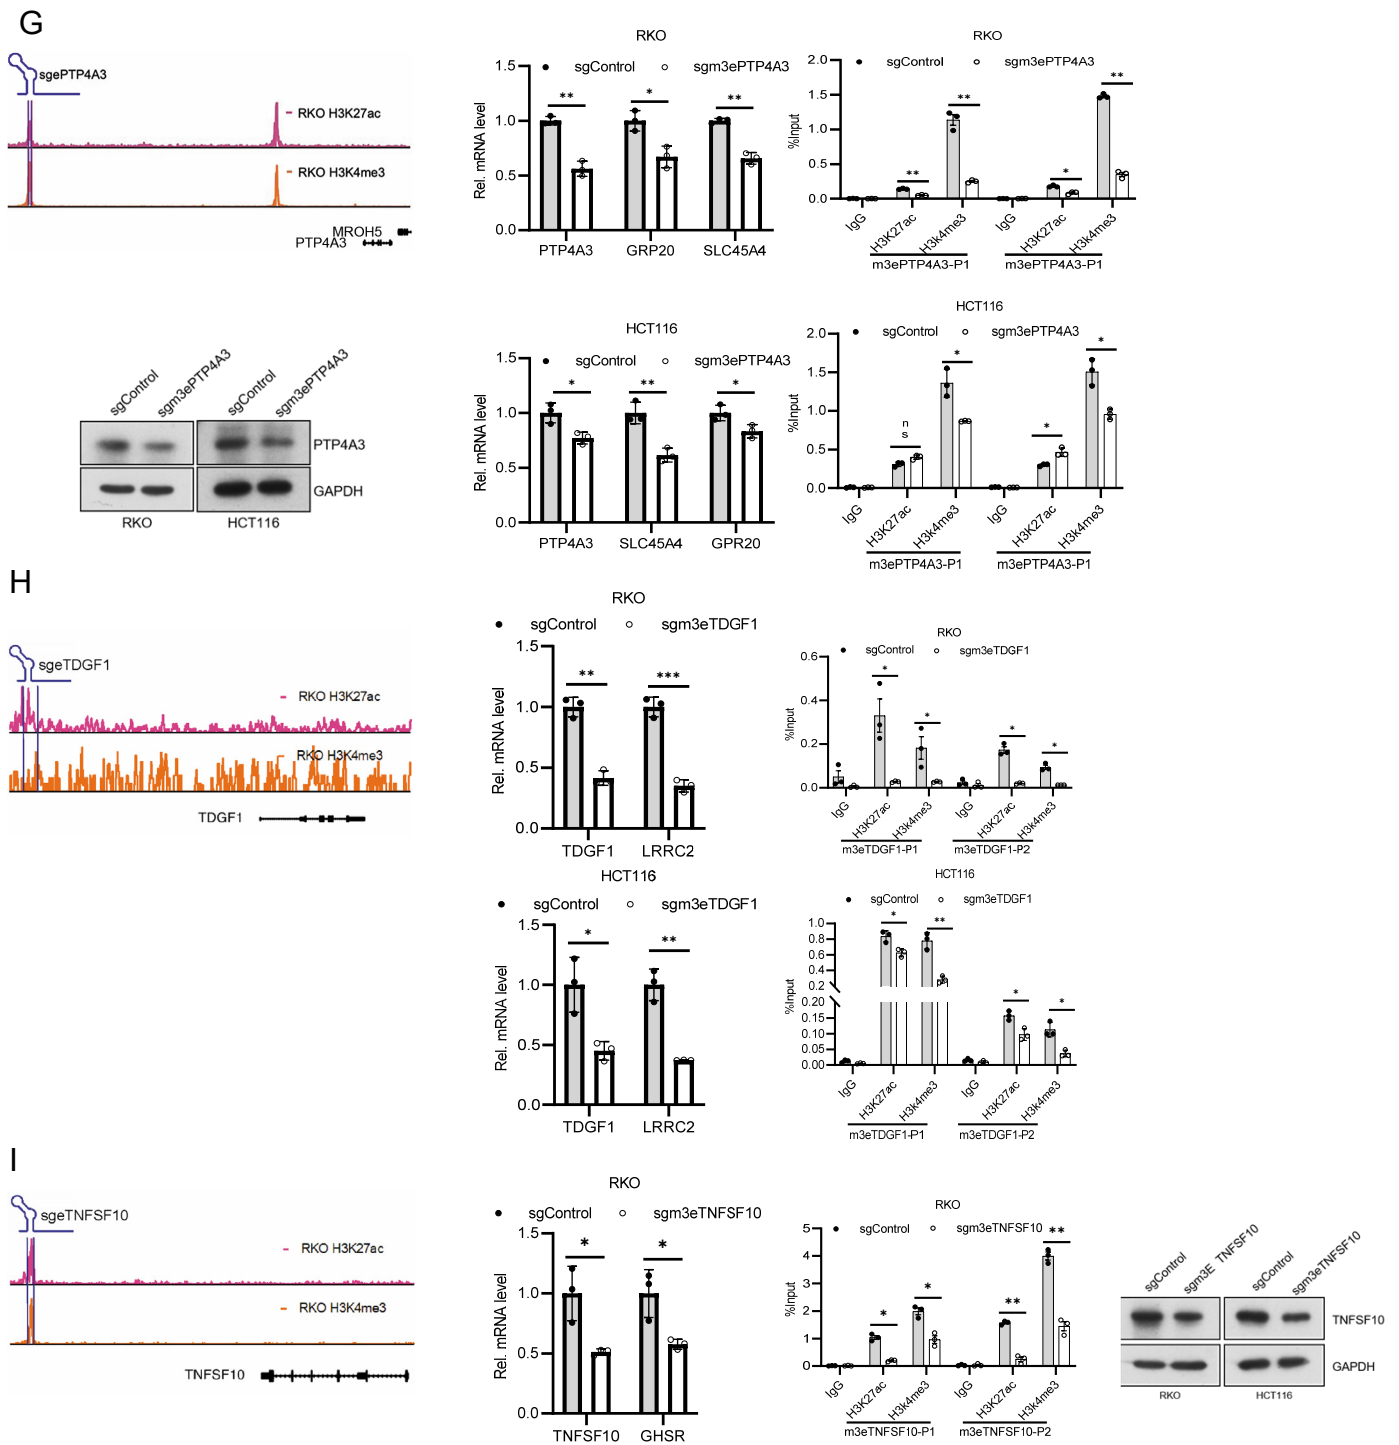

**Fig. S5 Inhibition of m3Es represses target gene expression.** The sketch maps of sgRNA design, target gene expression of mRNA and protein, histone modifications on the m3Es proximal to *CBX8* (A), *CCND1* (B), *JAK3* (C), *KRT18* (D), *RPS6KA5* (E), *SNAI1* (F), *PTP4A3* (F), *TDGF1* (H) and *TNFSF10* (I), in RKO and HCT116 cells. The indicated cells were transfected with multiple sgRNAs together and the antibiotic-selected pooled stable cells were used for study. \* means p value < 0.05, \*\* for p value < 0.01. Data are represented as mean  $\pm$  SD or SEM. *p*-values are calculated by two-tailed unpaired t test.

Fig. S6

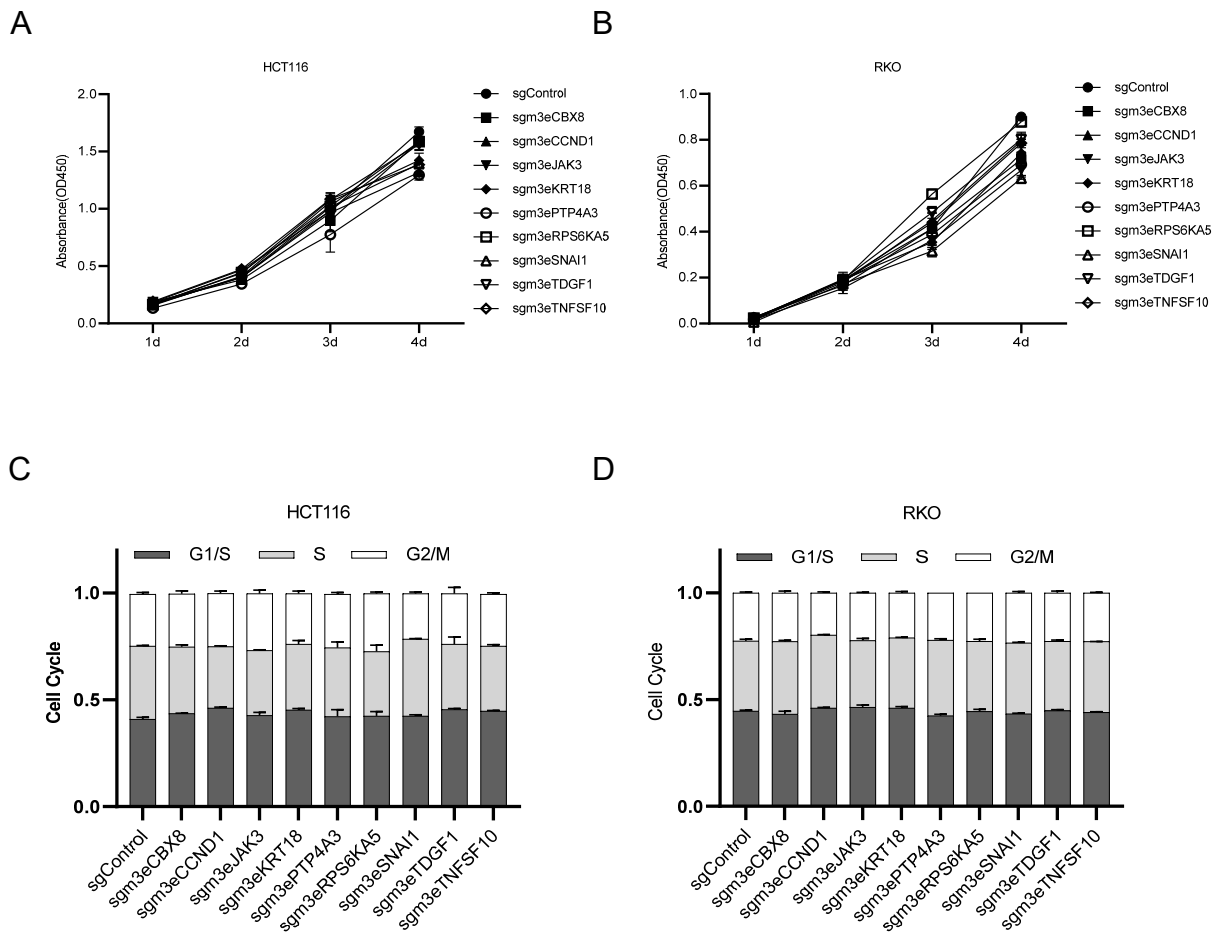

**Fig. S6 Functions of the identified Vm3Es on cell proliferation and cell cycle. (A&B)** Cell proliferation analyzed by CCK-8 assay of the above cell lines. **(C&D)** Cell cycle distributions analyzed by flowcytometry of stable cell lines with stable expression of the indicated CRISPR/sgrNAs.



Fig. S7

A

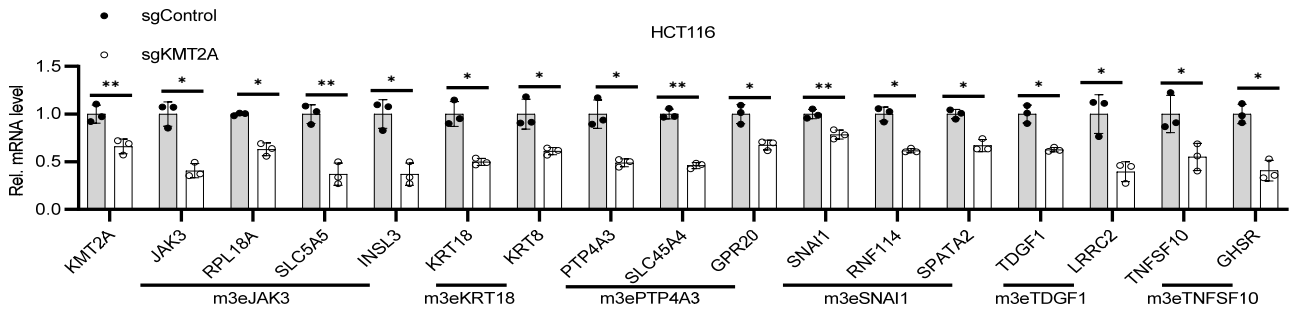

B

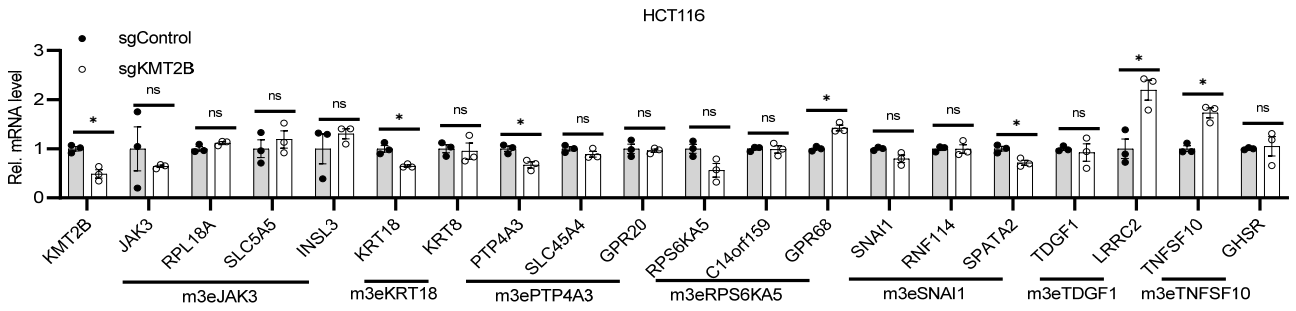

C

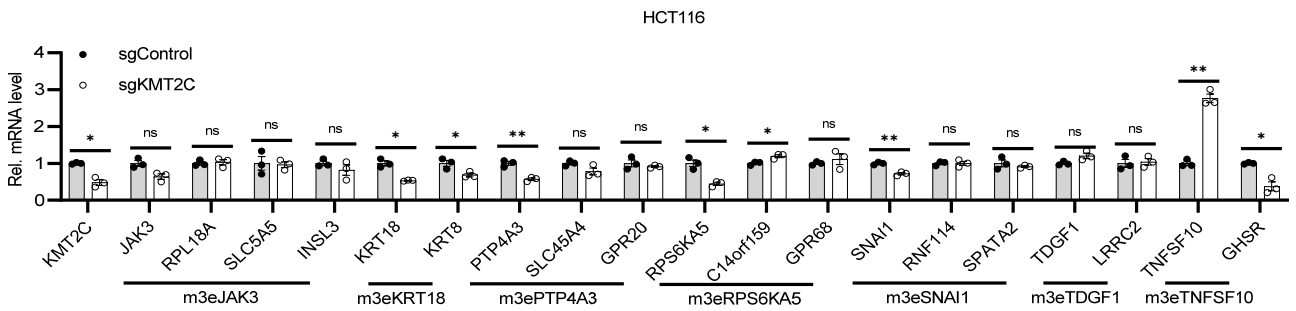

D

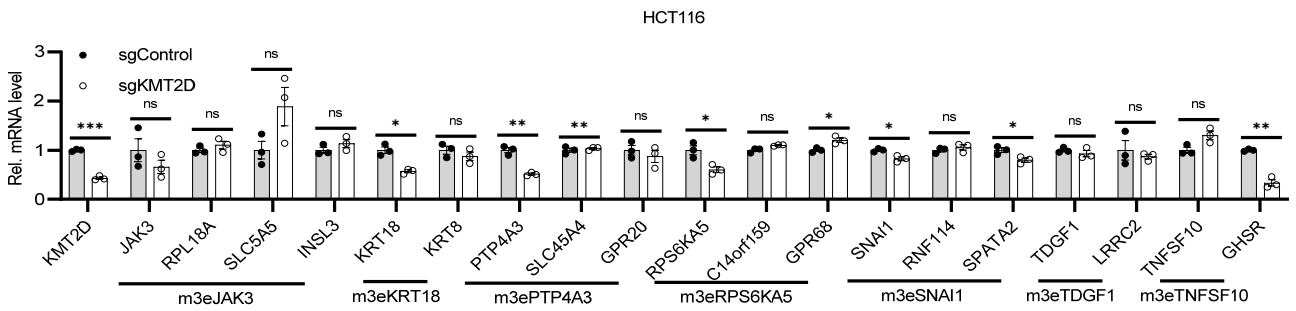

E

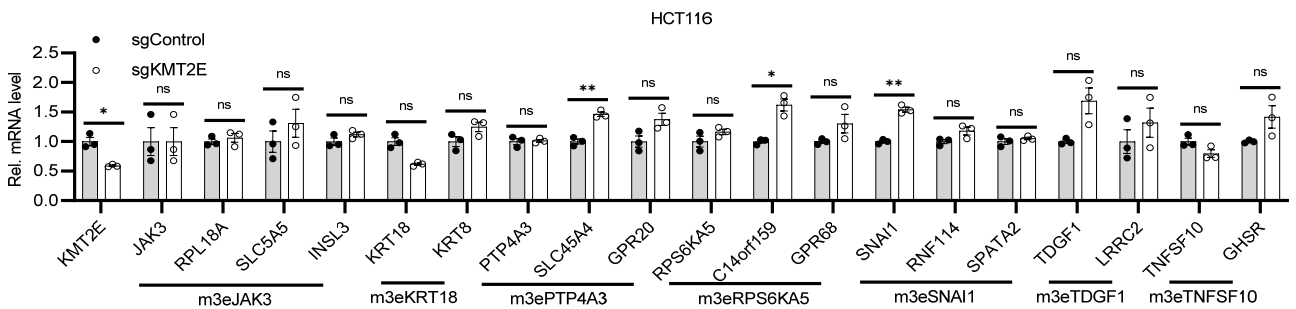

Fig. S7 (continued)

F

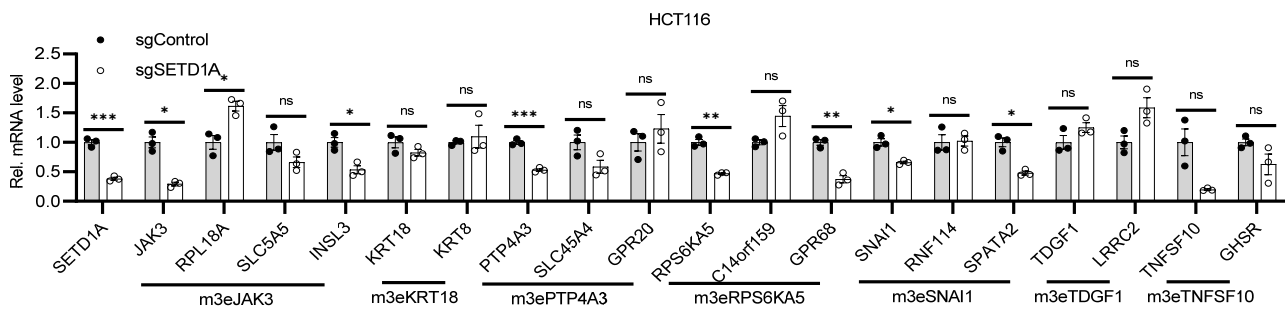

G

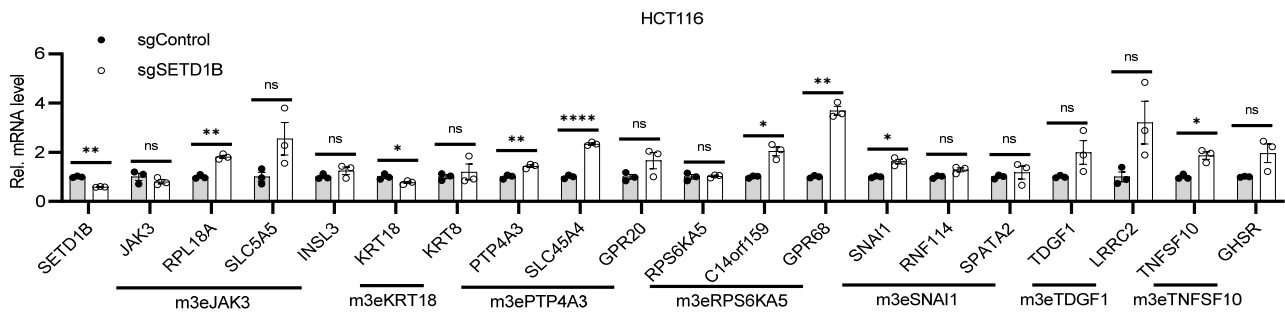

H

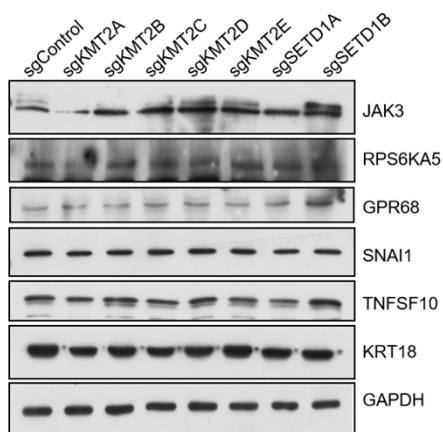

**Fig. S7 Screen of methyltransferases regulating m3E target genes.** Bar plot showing the relative mRNA level of enhancer loci adjacent genes in *KMT2A* (A), *KMT2B* (B), *KMT2C* (C), *KMT2D* (D), *KMT2E* (E), *SETD1A* (F) and *SETD1B* (G) KD HCT116 cell line. (H) Western blotting of the proximal genes for m3Es in *KMT2A-E*, *SETD1A&B* KD HCT116 cells.

Fig. S8

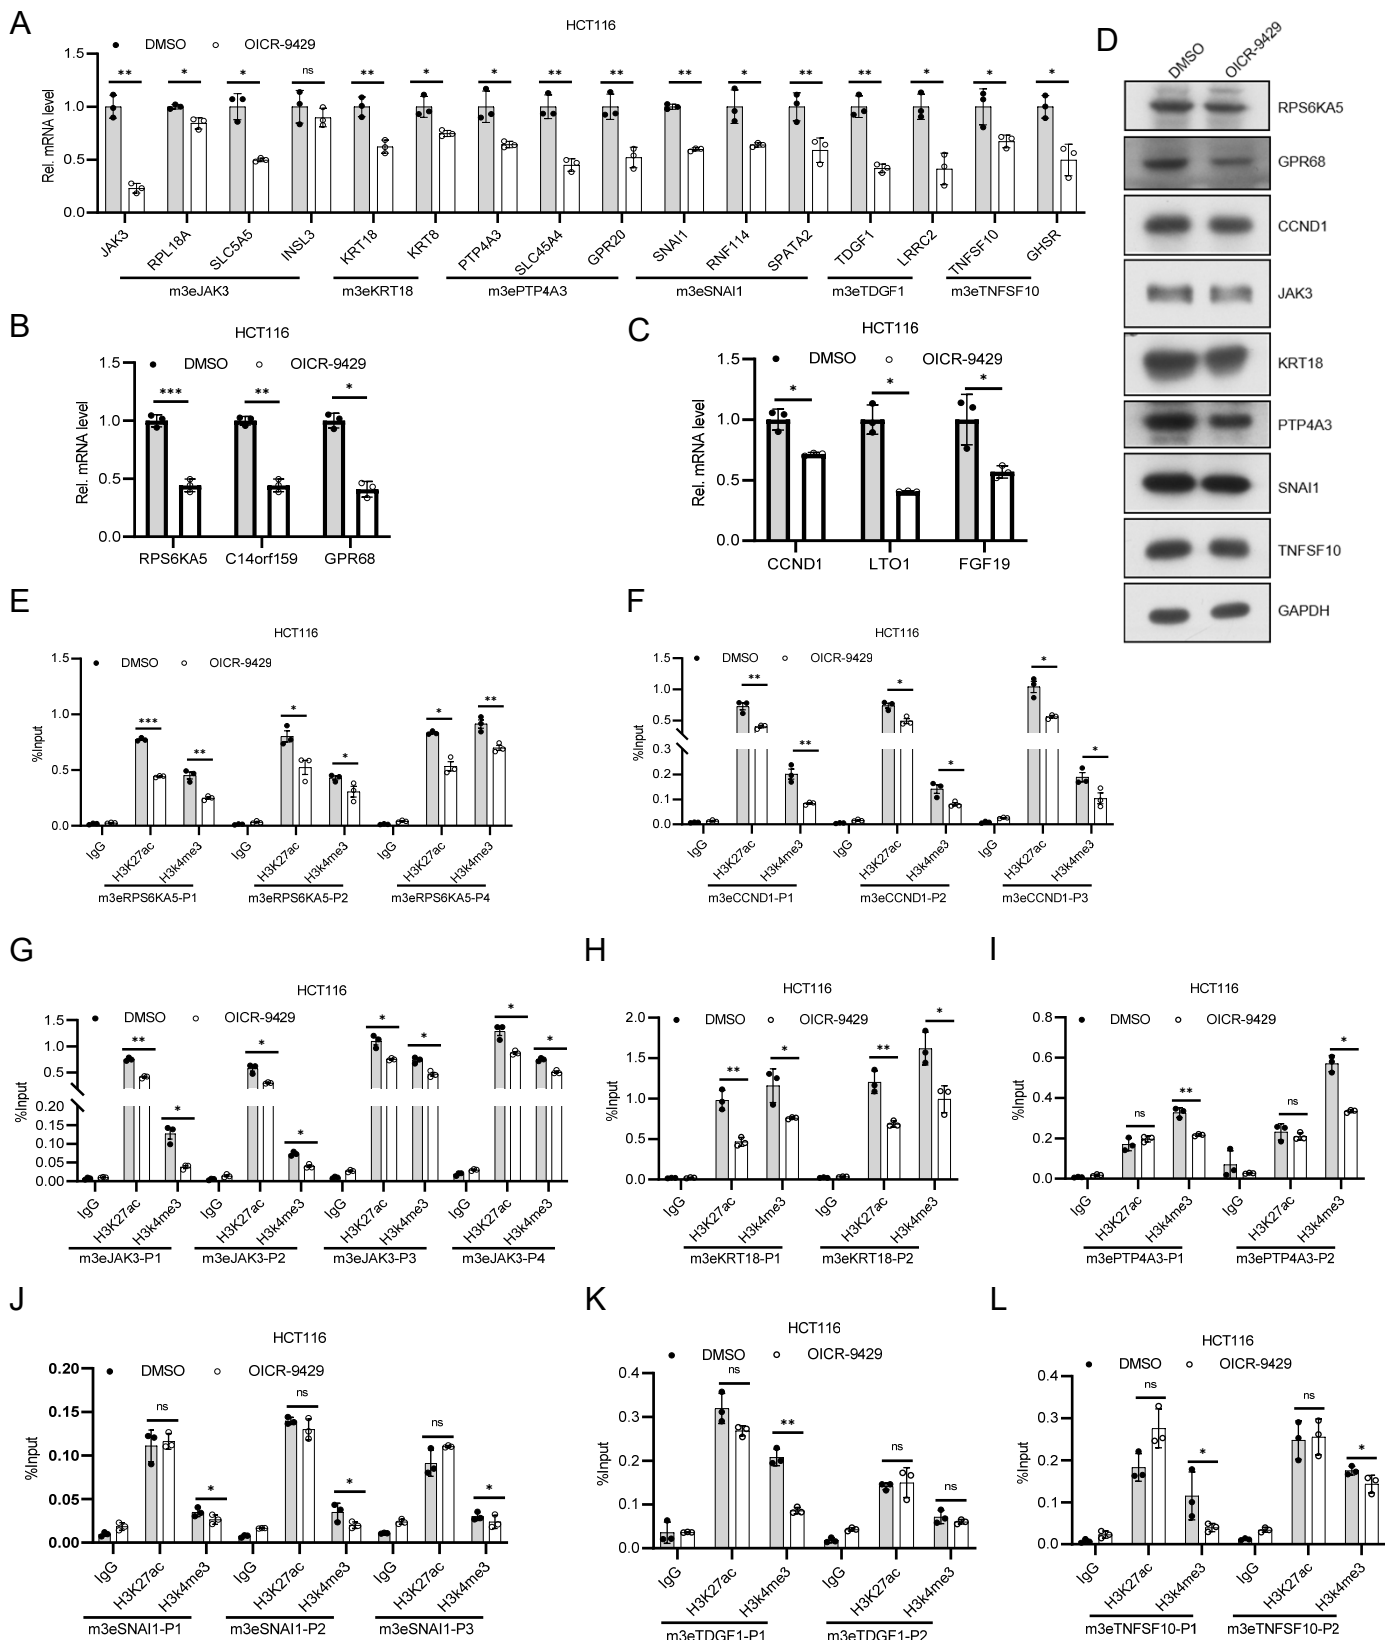

**Fig. S8 OICR-9429 treatment repressed the identified m3Es. (A-C)** Bar plot showing the relative mRNA level of the proximal genes for m3Es in HCT116 after OICR-9429 (10  $\mu$ M) treatment for 48h. **(D)** Western blotting of the proximal genes for m3Es in HCT116 after OICR-9429 (10  $\mu$ M) treatment for 48h. **(E-L)** ChIP-qPCR assessing H3K27ac and H3K4me3 level on m3Es of *RPS6KA5* (E), *CCND1* (F), *JAK3* (G), *KRT18* (H), *PTP4A3* (I), *SNAI1* (J), *TDGF1* (K) and *TNFSF10* (L) in HCT116 with OICR-9429 treatment (10  $\mu$ M) for 48h.

Fig. S9

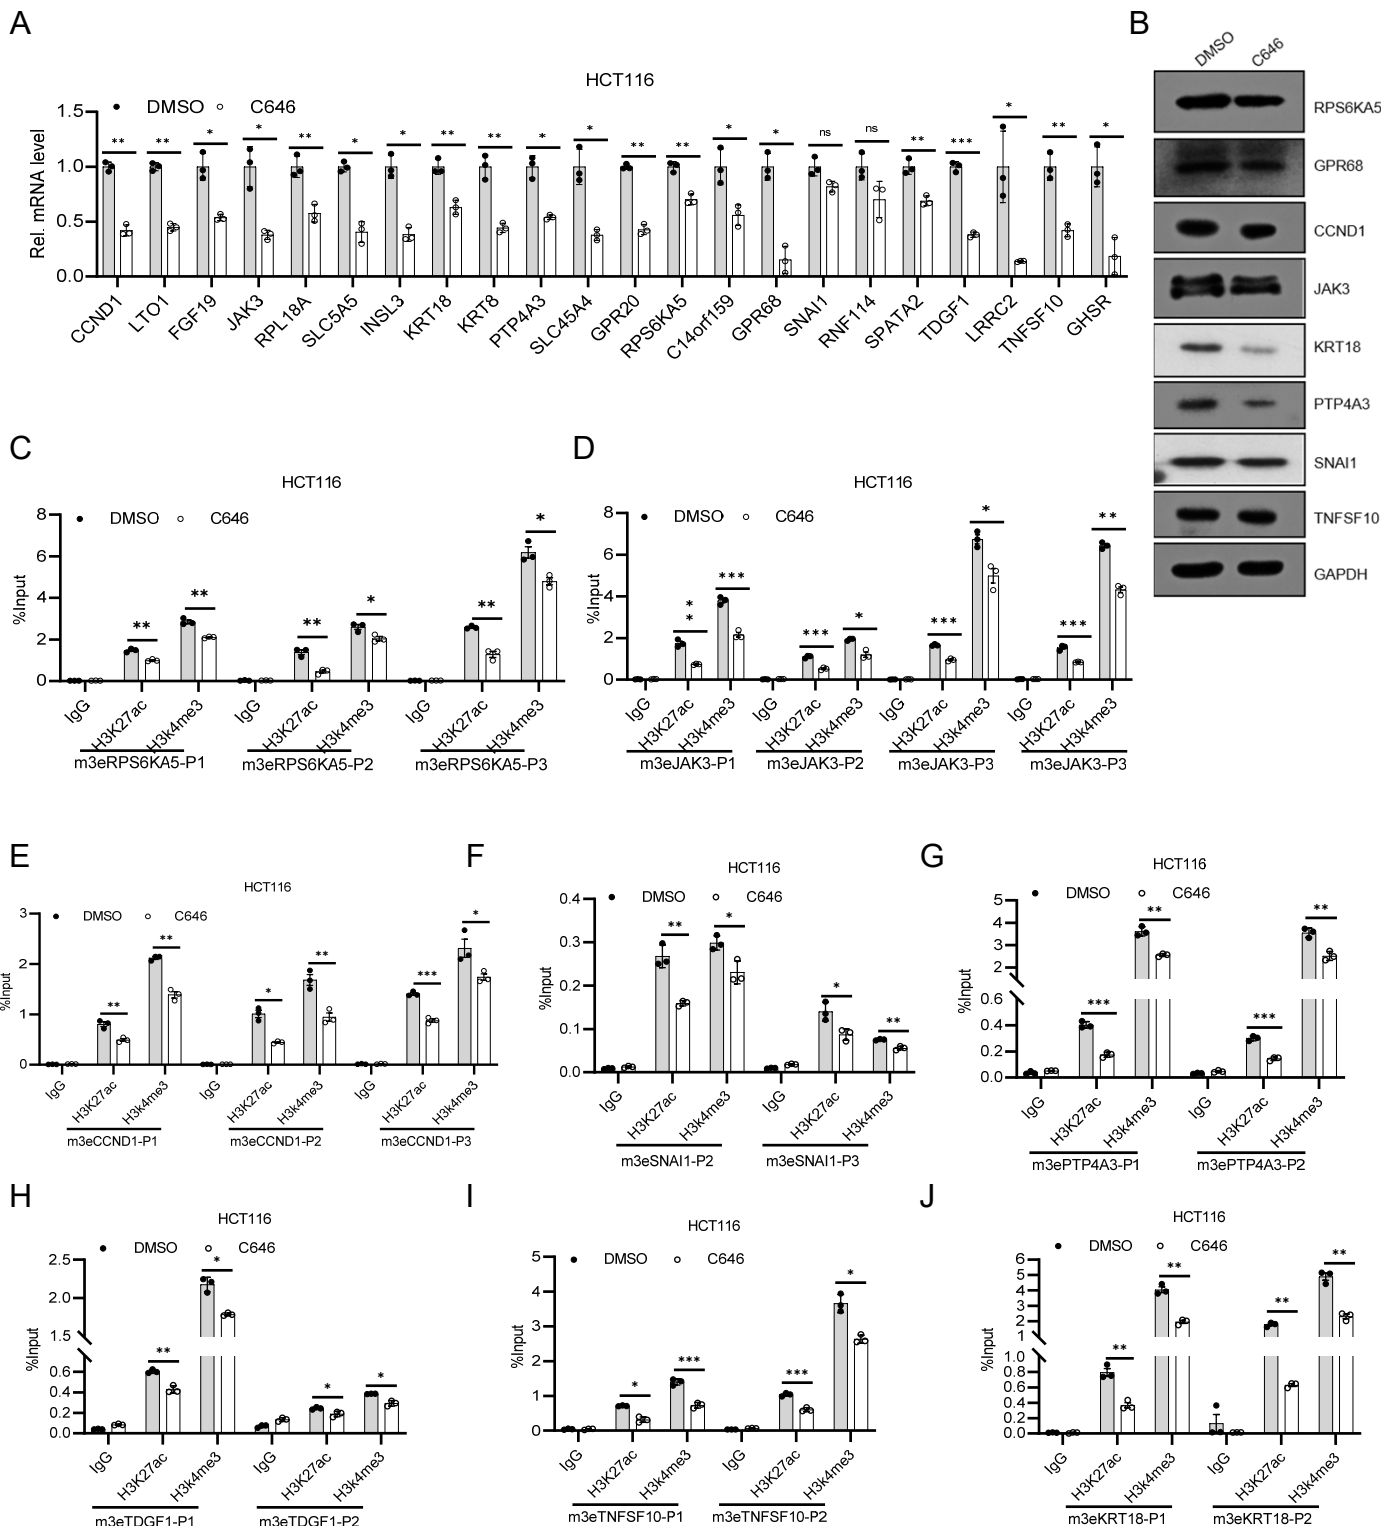

**Fig. S9 C646 treatment repressed histone modifications on the identified Vm3Es. (A)** Bar plot showing the relative mRNA level of the proximal genes for m3Es in HCT116 after C646 treatment (10  $\mu$ M) for 12h. **(B)** Western blotting of the proximal genes for m3Es in HCT116 after OICR-9429 (10  $\mu$ M) treatment for 48h. **(C-J)** ChIP-qPCR assessing H3K27ac and H3K4me3 level on the m3Es of *RPS6KA5* (C), *JAK3* (D), *CCND1* (E), *SNAI1* (F), *PTP4A3* (G), *TDGF1* (H), *TNFSF10* (I) and *KRT18* (J) in HCT116 with the treatment of C646 (10  $\mu$ M) for 12h.

Fig. S10

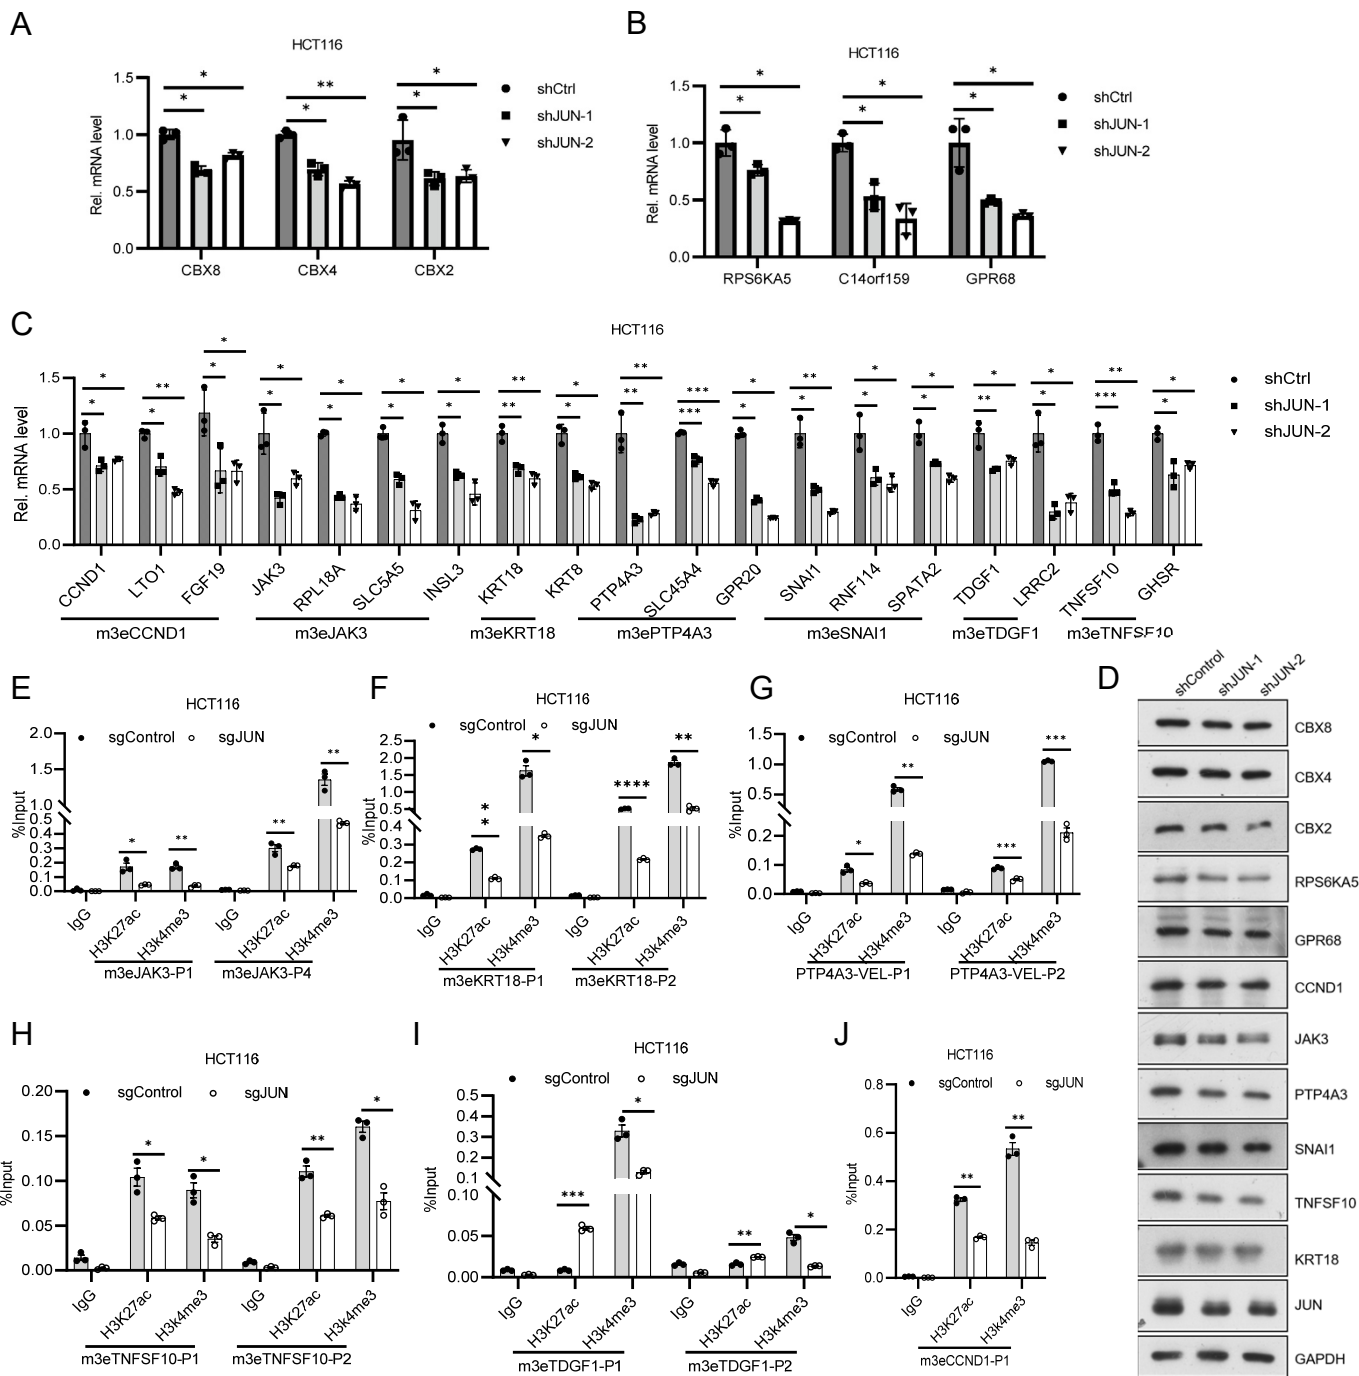

**Fig. S10 JUN regulates the identified Vm3Es in CRC. (A-C)** Bar plot showing the relative mRNA level of the proximal genes for m3Es in JUN KD HCT116 cells. **(D)** Western blotting of the proximal genes for for m3Es in JUN KD HCT116 cells. **(E-J)** ChIP-qPCR assessing H3K27ac and H3K4me3 level on the m3Es of *JAK3* (E), *KRT18* (F), *PTP4A3* (G), *TNFSF10* (H), *TDGF1* (I) and *CCND1* (J) in JUN KD cell line.

Fig. S11

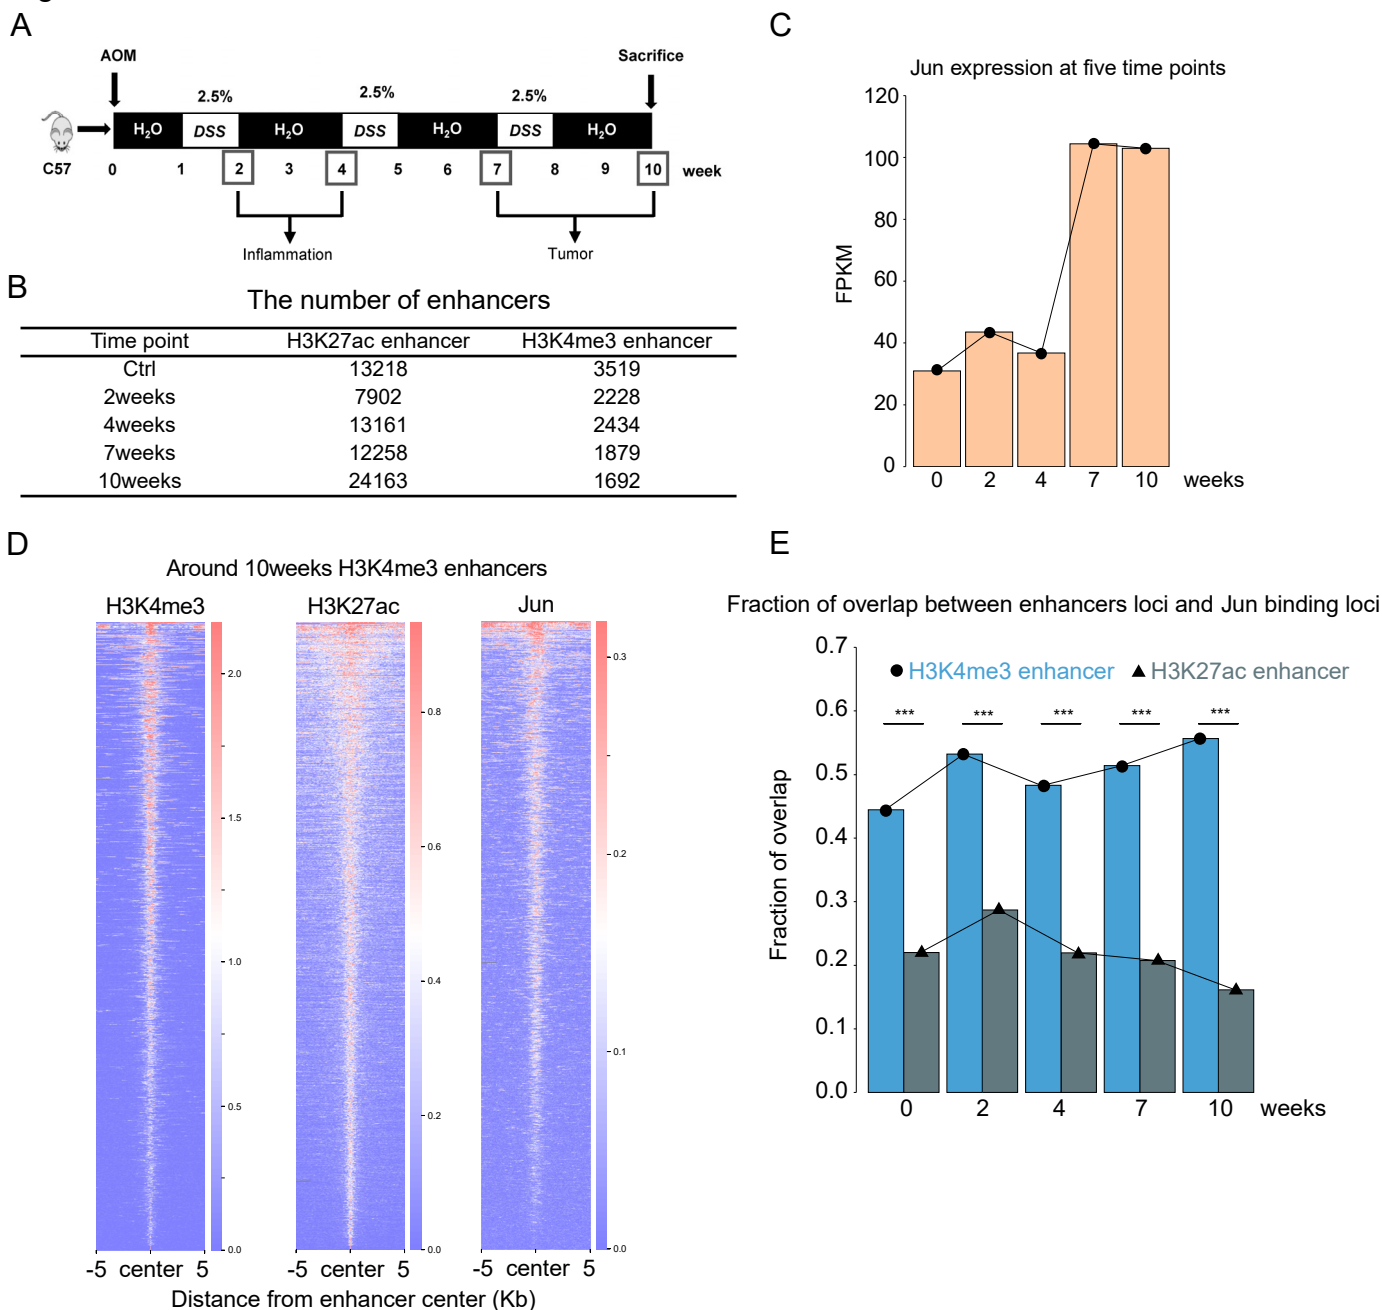

**Fig. S11 JUN binds to H3K4me3 enhancer loci in the AOM-DSS induced CRC model. (A)** Experimental workflow for studying the H3K4me3 enhancer of Colitis-Associated Cancer. 2- and 4-week represented the inflammation stage and 7- and 10-week for tumor stage. **(B)** The number of H3K27ac enhancers and H3K4me3 enhancers at five time points. **(C)** Jun expression at five time points. FPKM: Fragments Per Kilobase of transcript per Million fragments mapped. **(D)** Heatmaps of H3K4me3, H3K27ac and JUN signals (CPM) over 10weeks H3K4me3 enhancer loci. All rows are centered on the peaks center  $\pm$  5 kb. CPM: Counts Per Million. **(E)** JUN are more likely to show evidence of binding to H3K4me3 enhancer loci.  $\chi^2$  test of independence between JUN binding loci and two types of enhancer loci.

Fig. S12

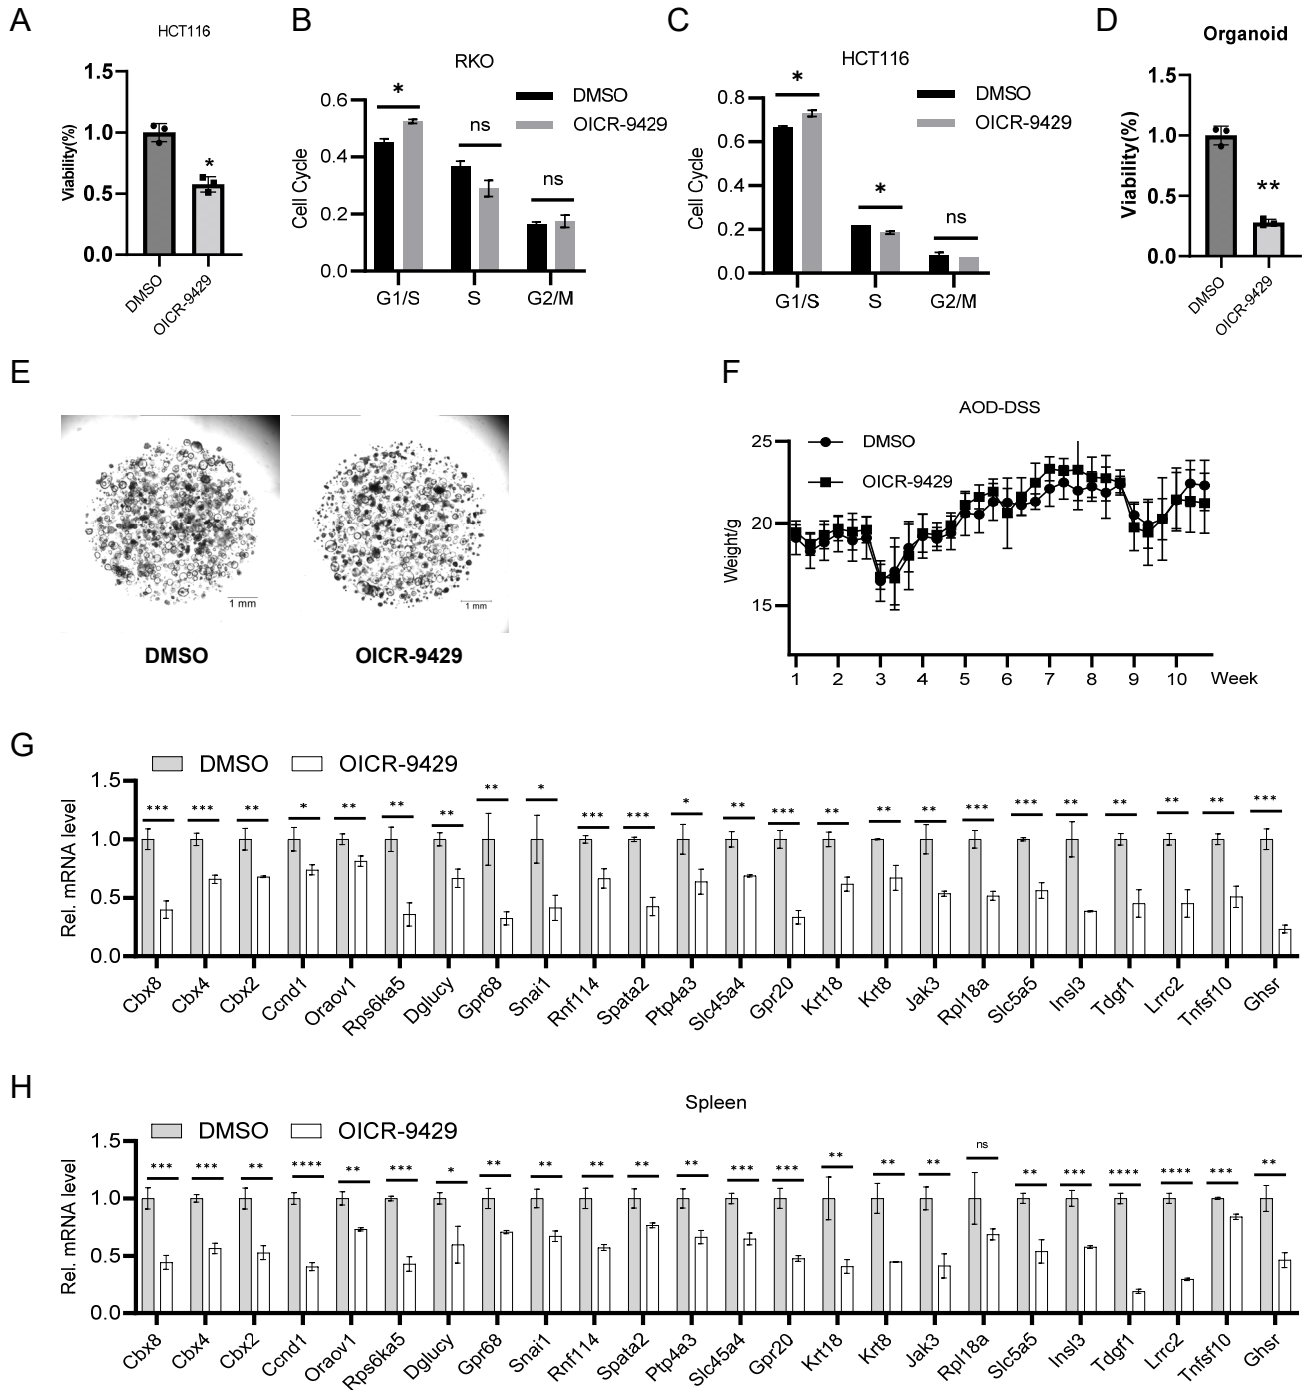

**Fig. S12 OICR-9429 treatment repressed CRC. (A)** Cell viability analyzed by CCK-8 assay of HCT116 with the treatment of OICR-9429 (80  $\mu$ M) for 48h. **(B-C)** Cell cycle distributions analyzed by flowcytometry of HCT116(B) and RKO(C) with the treatment of OICR-9429(20 $\mu$ M) for 48h. **(D)** Viability of colorectal cancer organoid with the treatment of OICR-9429 (40  $\mu$ M) for 7 days, measured by CCK-8 assay. **(E)** Colorectal cancer organoid morphology imaged by a light microscope after the treatment of OICR-9429 (40  $\mu$ M) for 7 days. **(F)** Mean body weight increment of the mice subject to the AOM/DSS treatment during the experimental procedure. **(G&H)** Bar plot showing the relative mRNA level of the proximal genes for m3Es in intestine and spleen tissue of AOM-DSS induced CRC model with intraperitoneally injected with OICR-9429 (5 mg/kg, three time per week at the indicated time points).
